# Supplementary material
Source: PubMed Central journal article supplement (PMC6342655)

## Index of Contents

S1-S7: Supplemental Figures

S8 – S24: Spectra of Synthetic Compounds

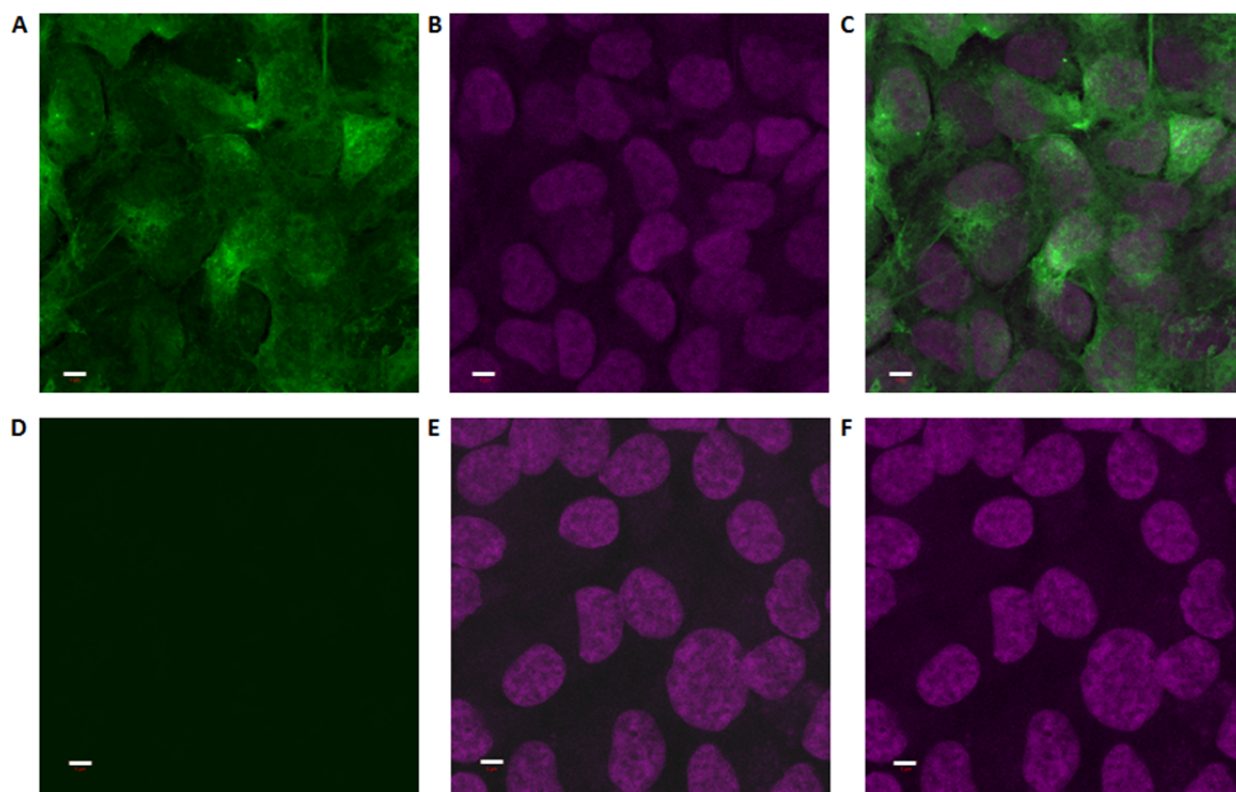

**Figure S1.** Enlarged version of fluorescence images of cell labeling by probe **1a**. Human T-24 cancer cells were treated with clickable Cy3 fluorophore **8** in the presence (**A-C**) or absence (**D-F**) of probe **1a**. **A&D**: Cy3 channel (green), **B&E**: DAPI channel (magenta), **C&F**: Merged images. Scale bars (white) indicate 5  $\mu\text{m}$ .

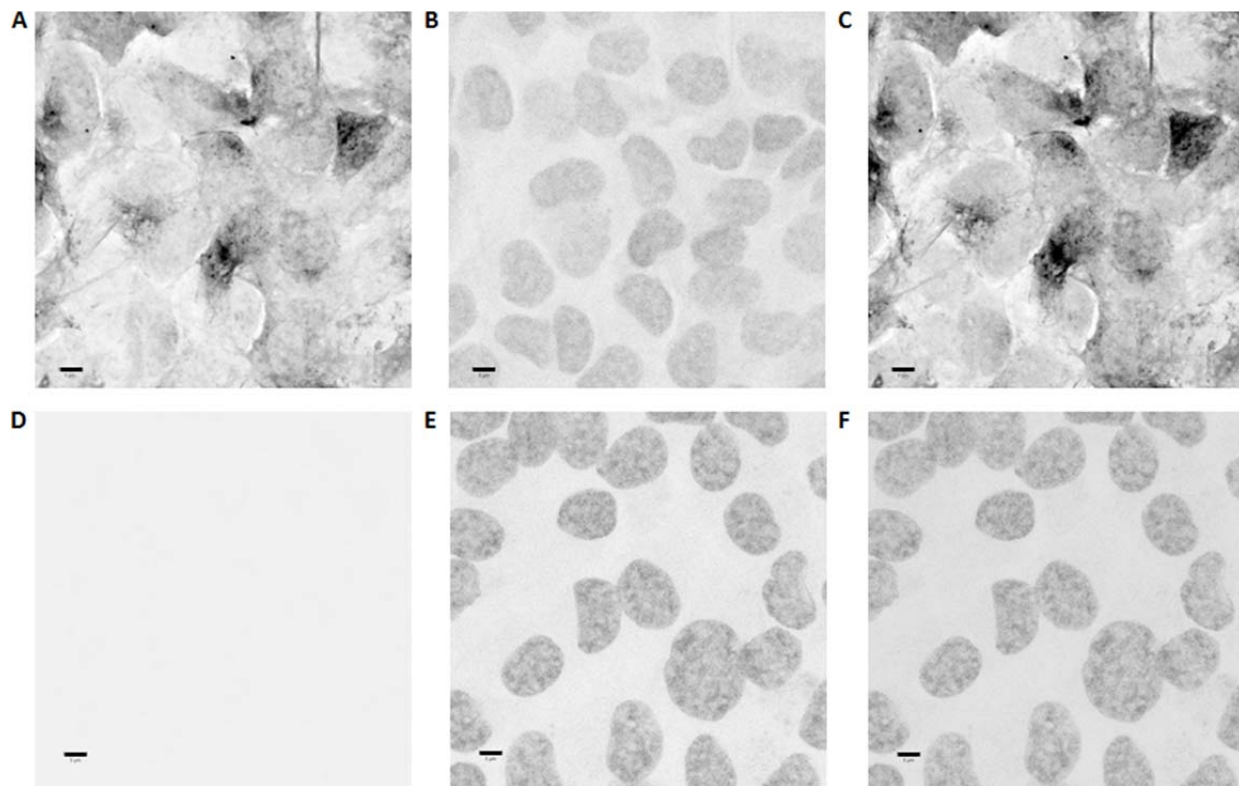

**Figure S2.** Enlarged and greyscaled version of fluorescence images of cell labeling by probe **1a**. Human T-24 cancer cells were treated with clickable Cy3 fluorophore **8** in the presence (**A-C**) or absence (**D-F**) of probe **1a**. **A&D**: Cy3 channel, **B&E**: DAPI channel, **C&F**: Merged images. Scale bars (black) indicate 5  $\mu\text{m}$ .

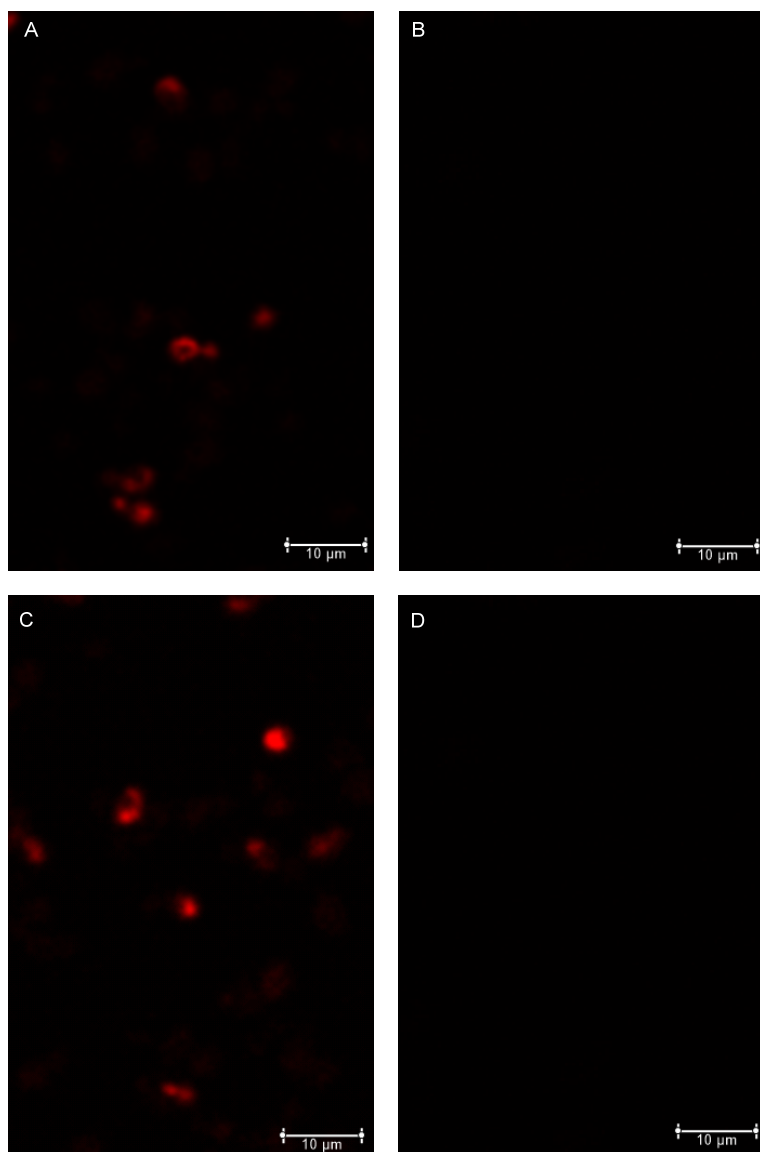

**Figure S3.** Enlarged version of fluorescence imaging results using *C. albicans* cells. Treatment with **8** in the presence or absence of **1a** was performed with WT cells (A and B, respectively, Cy3 channel (red)) and *itr1ΔΔ* cells (C and D, respectively). Scale bars indicate 10 μm.

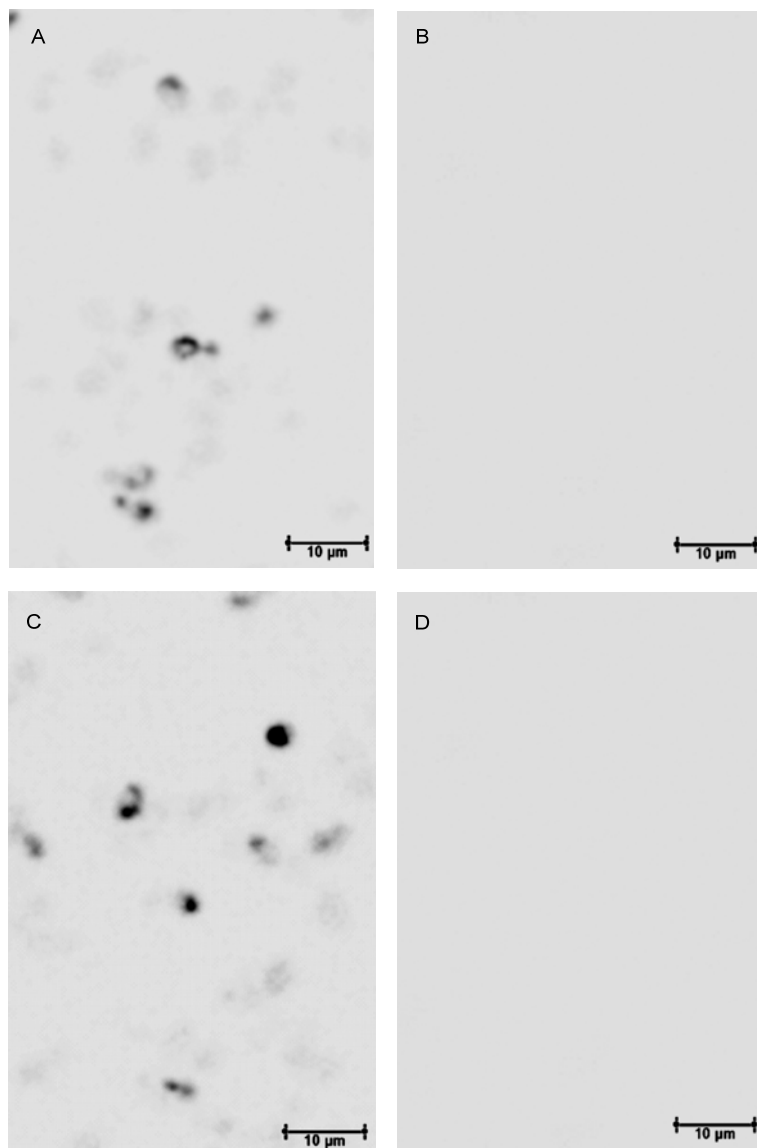

**Figure S4.** Enlarged and greyscaled version of fluorescence imaging results using *C. albicans* cells. Treatment with **8** in the presence or absence of **1a** was performed with WT cells (A and B, respectively) and *itr1*ΔΔ cells (C and D, respectively). Scale bars indicate 10 μm.

**A**

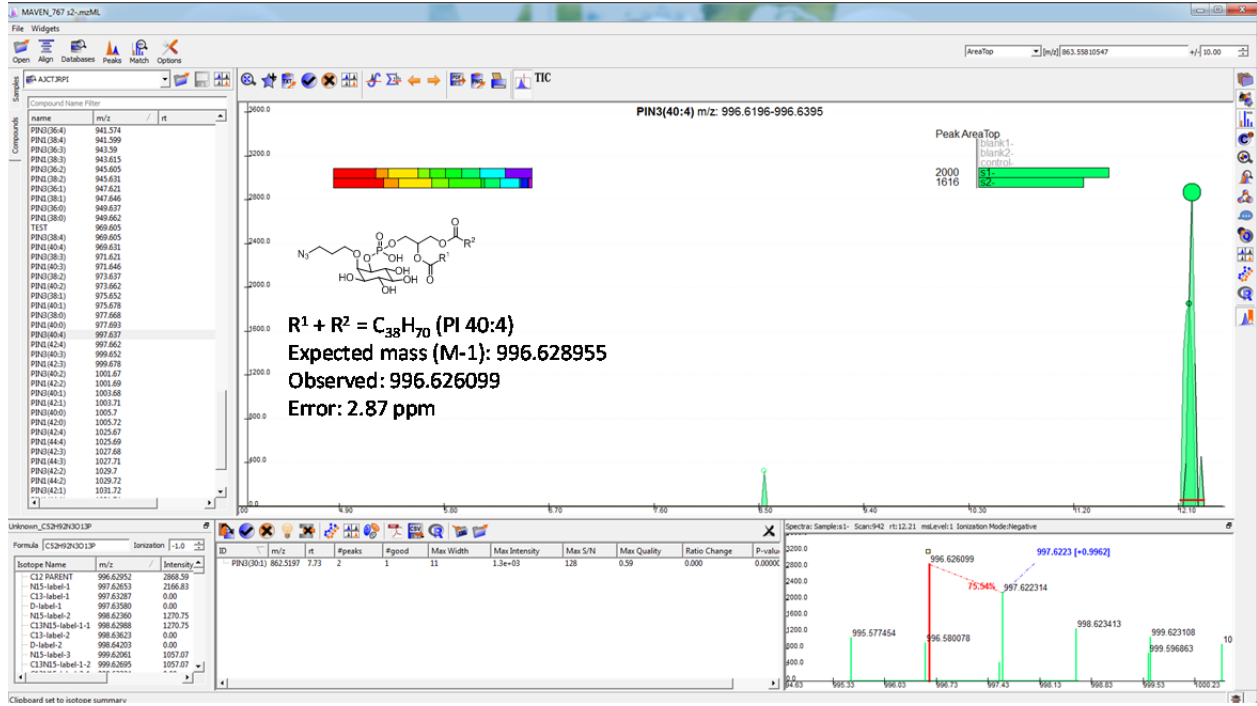

**B**

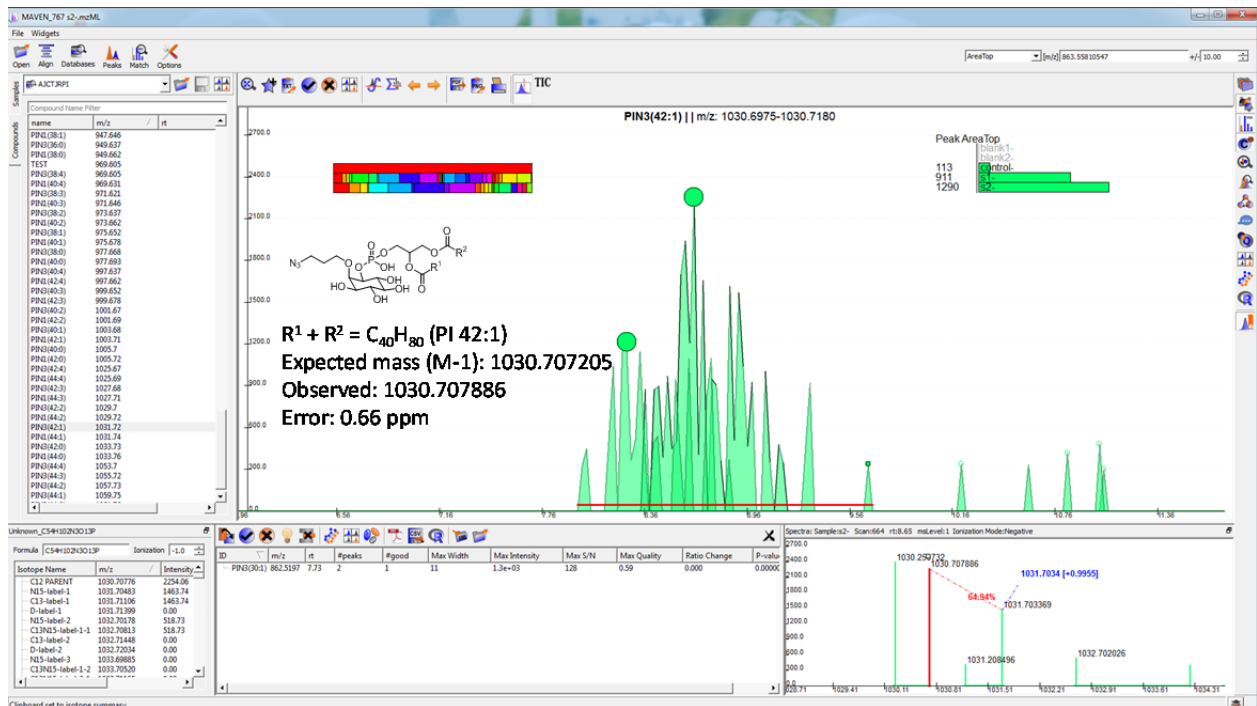



E

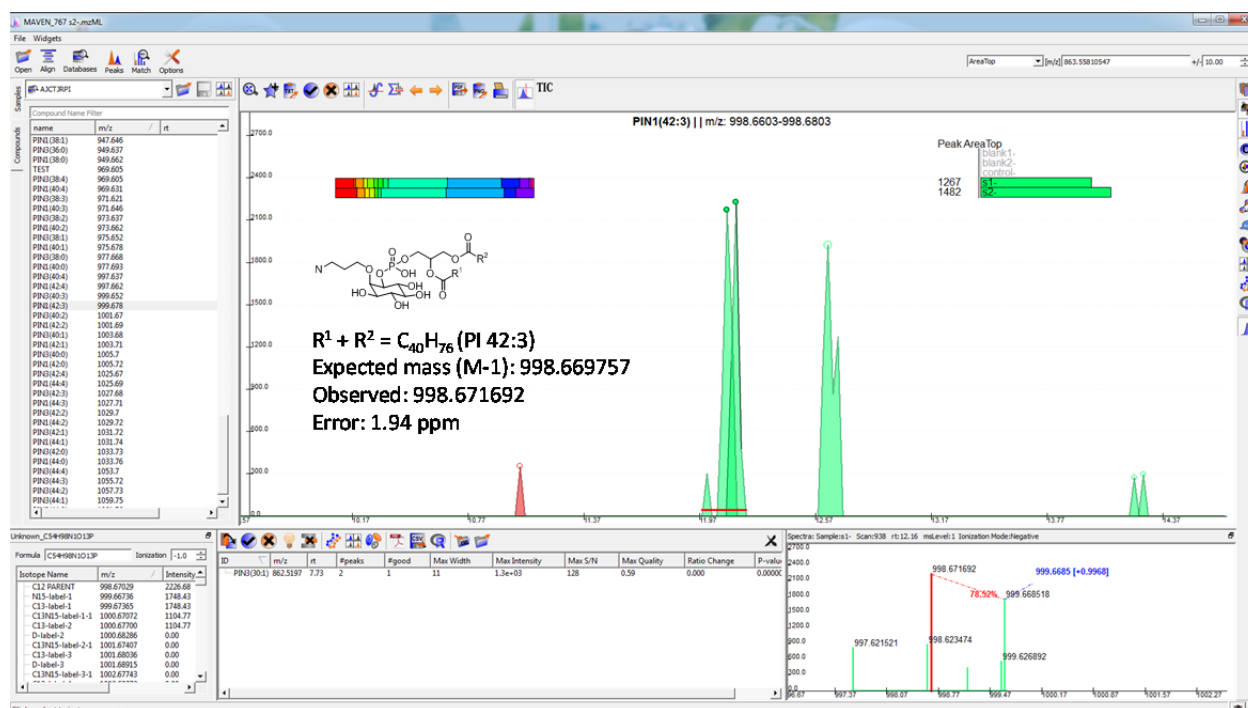

F

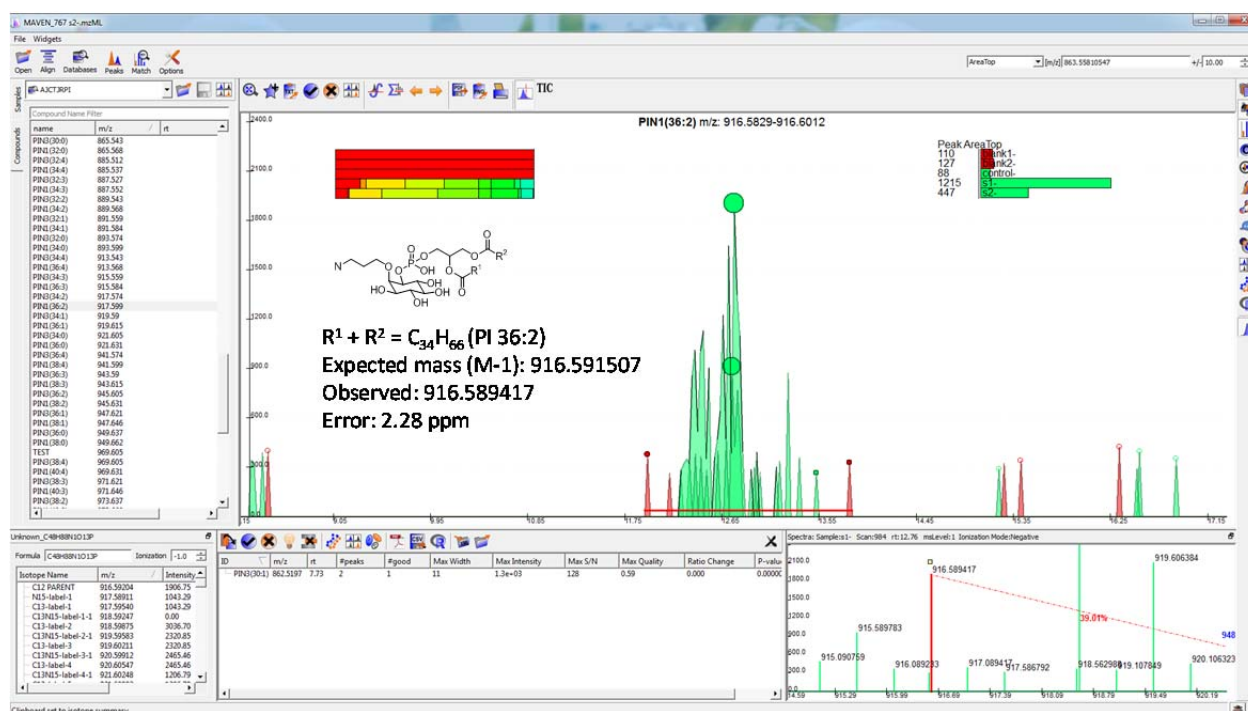

**Figure S5.** Representative mass spectra detected by liquid chromatography mass spectrometry (LCMS) for click-tagged products of *myo*-inositol probe **1a**. Structures are shown that match detected mass peaks. The x-axis shows the retention time from LC separation while the y-axis indicates the areas of peaks containing the relevant mass ion based on ion counts. The colored inset plots these peak areas and depicts two replicate samples (s1 and s2), a control sample of cells lacking probe **1a**, and blank samples. These spectra resulted from LCMS runs in negative mode on a Thermo Scientific Q Exactive Hybrid Quadrupole-Orbitrap Mass Spectrometer.



# <sup>1</sup>H NMR of compound 4

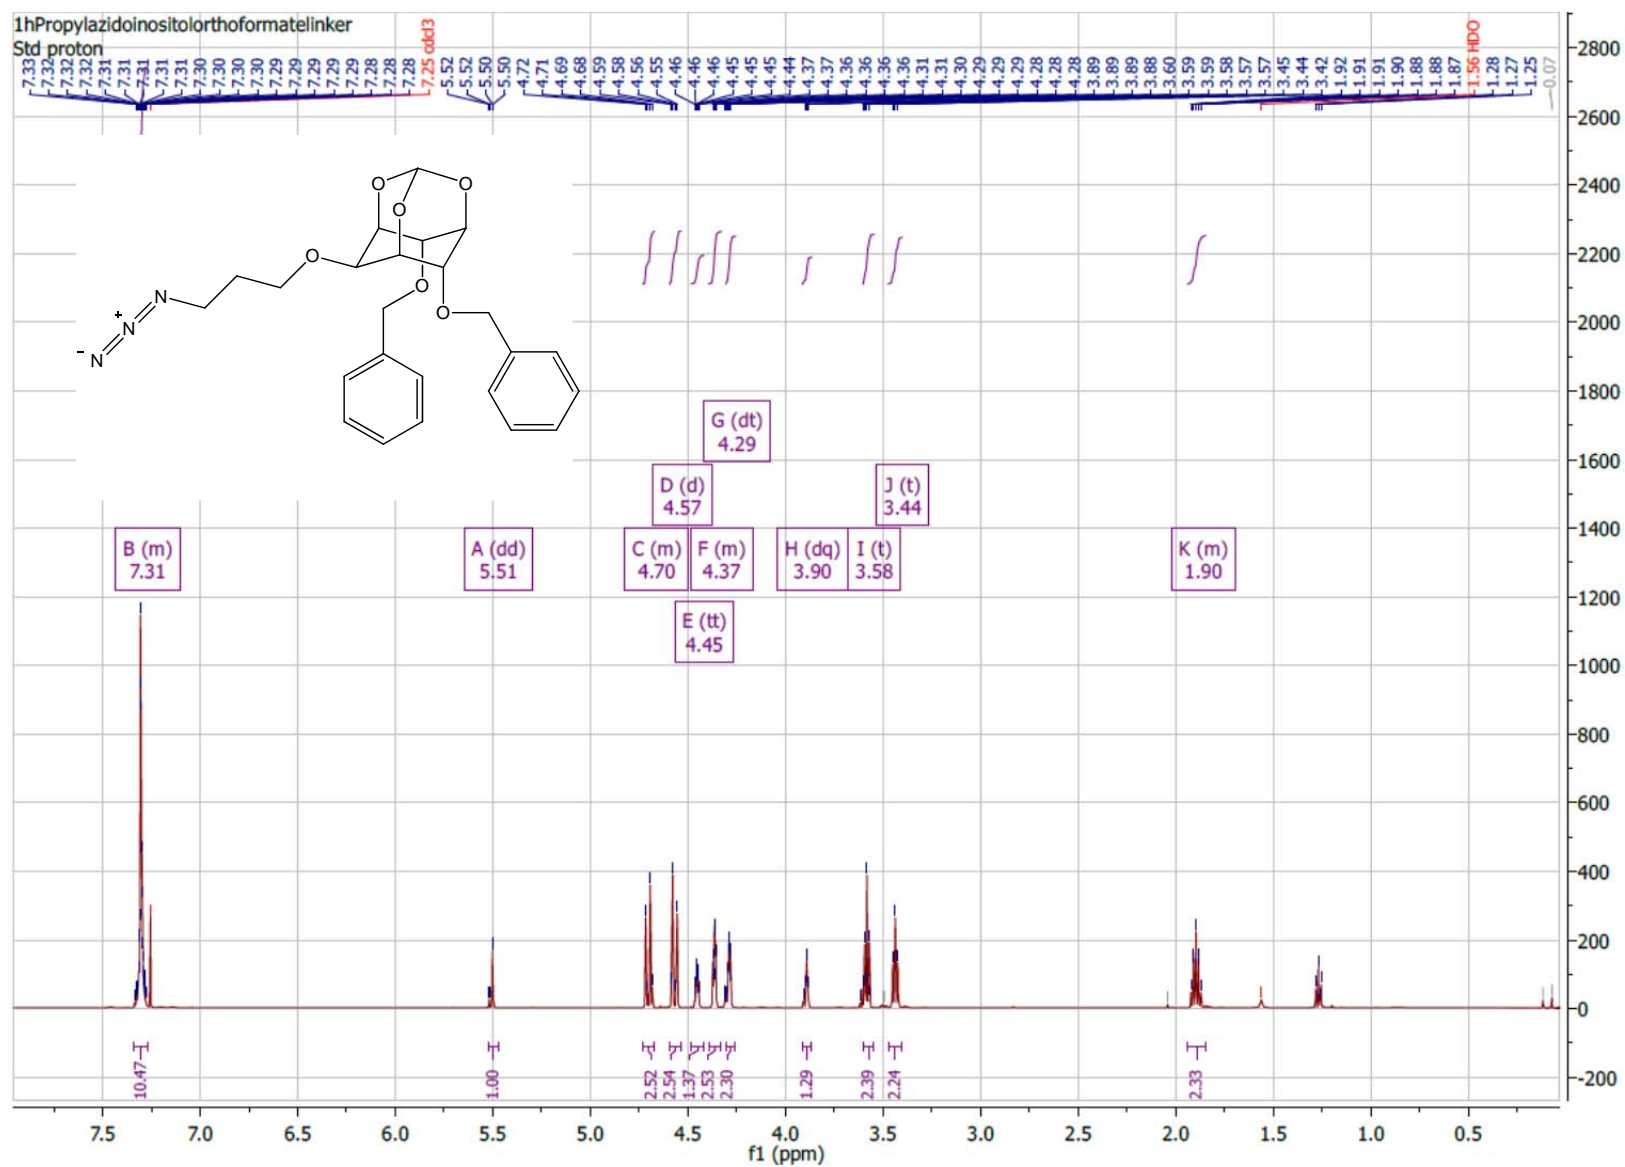



# <sup>13</sup>C NMR of compound 4

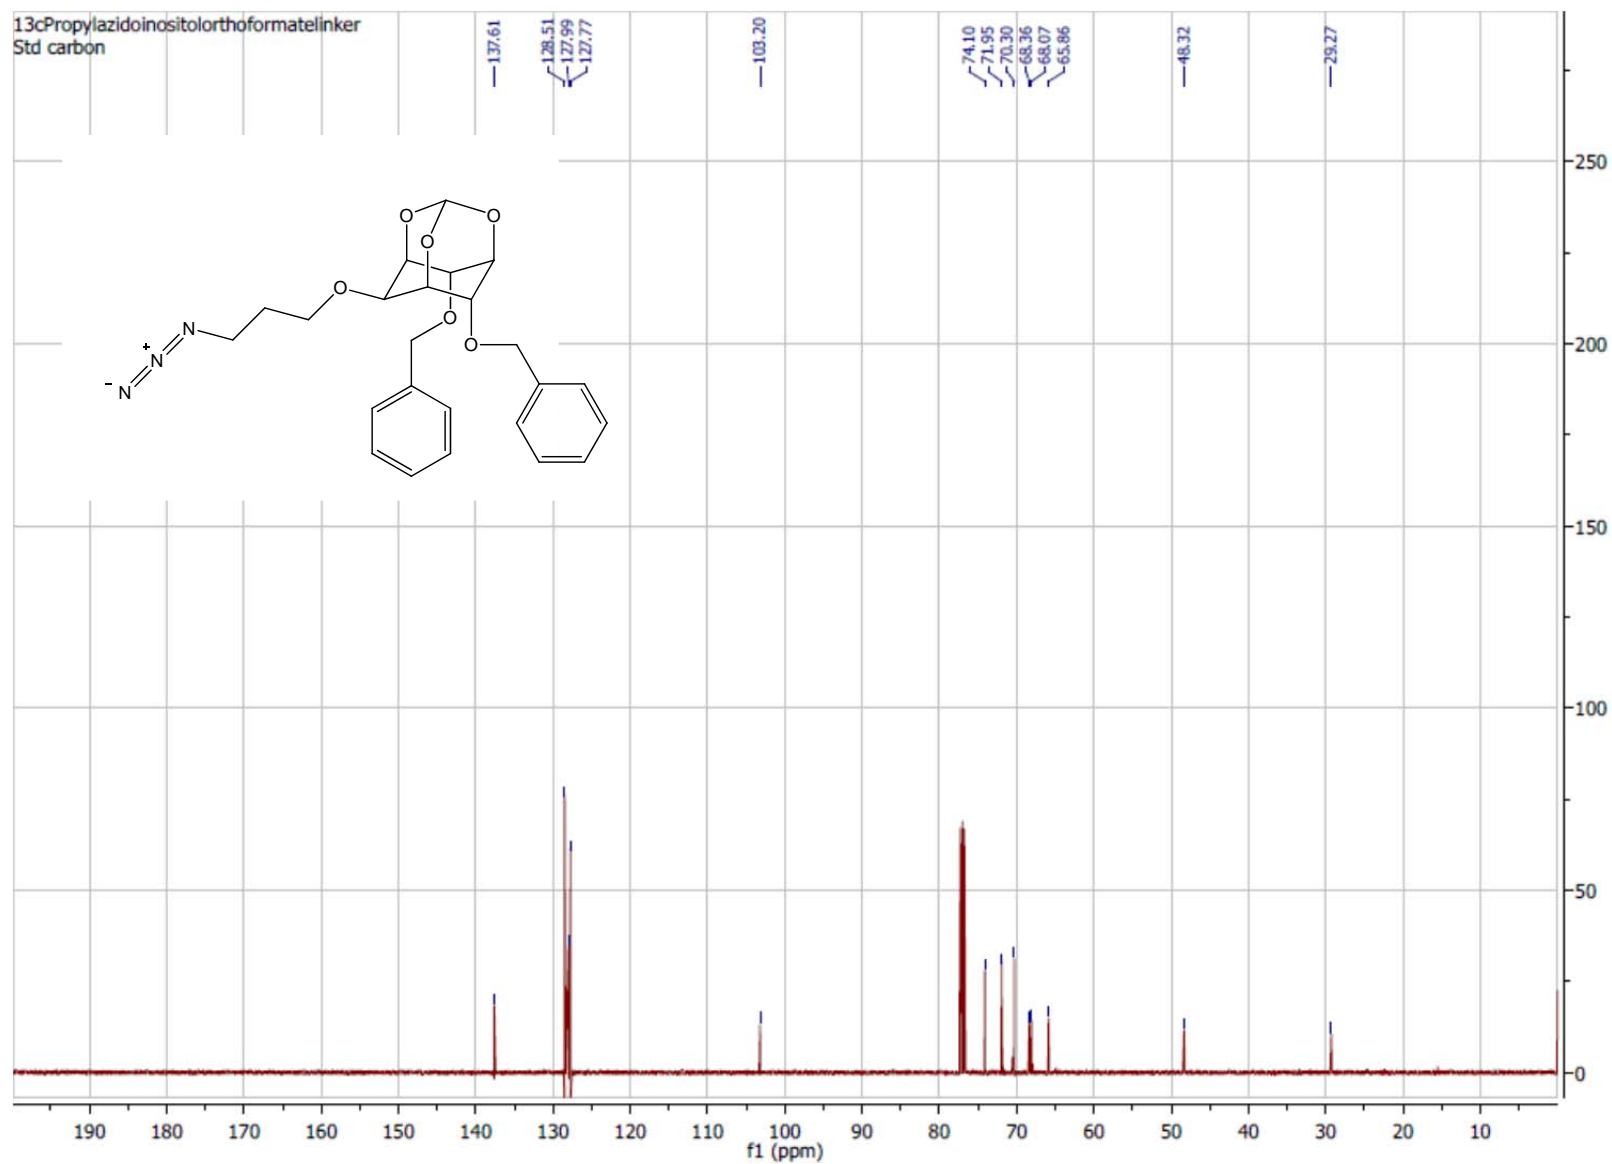

# ESI-MS of compound 4

Acq. Data Name: 140114\_Best\_tricks\_propylazidoinsorthoformdbz  
Internal Sample Id:  
Ionization Mode: ESI+ Orifice1 Volt Sweep: 30V  
MS Calibration Name: PEG\_DART\_1000 Acquired m/z Range: 200.0..500.0  
Reduction History: Correct Base[5.0%];Average(MS[1] 0.902..0.962)  
Experiment Date/Time: 1/14/2014 2:00:42 PM

Spec. Record Interval: 1.0[s]  
Ring Lens Volt: 10[V]  
Time of Maximum: 0.926[min]

Operator Name: Tricks

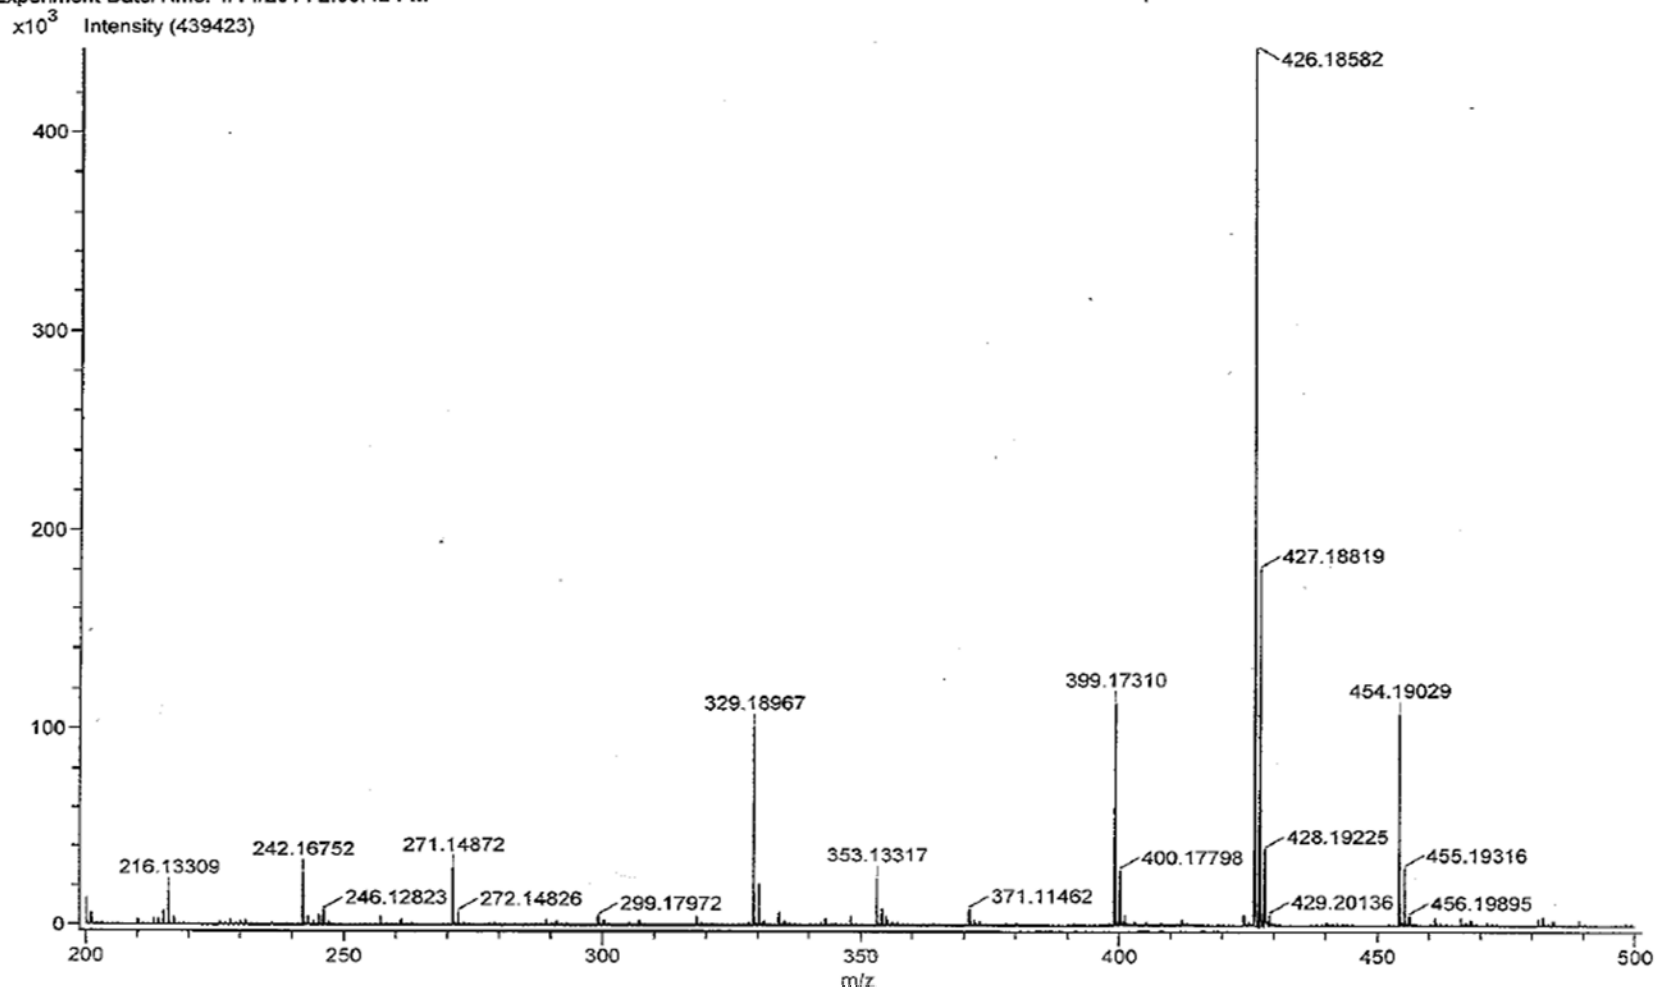

<sup>1</sup>H NMR of compound 5

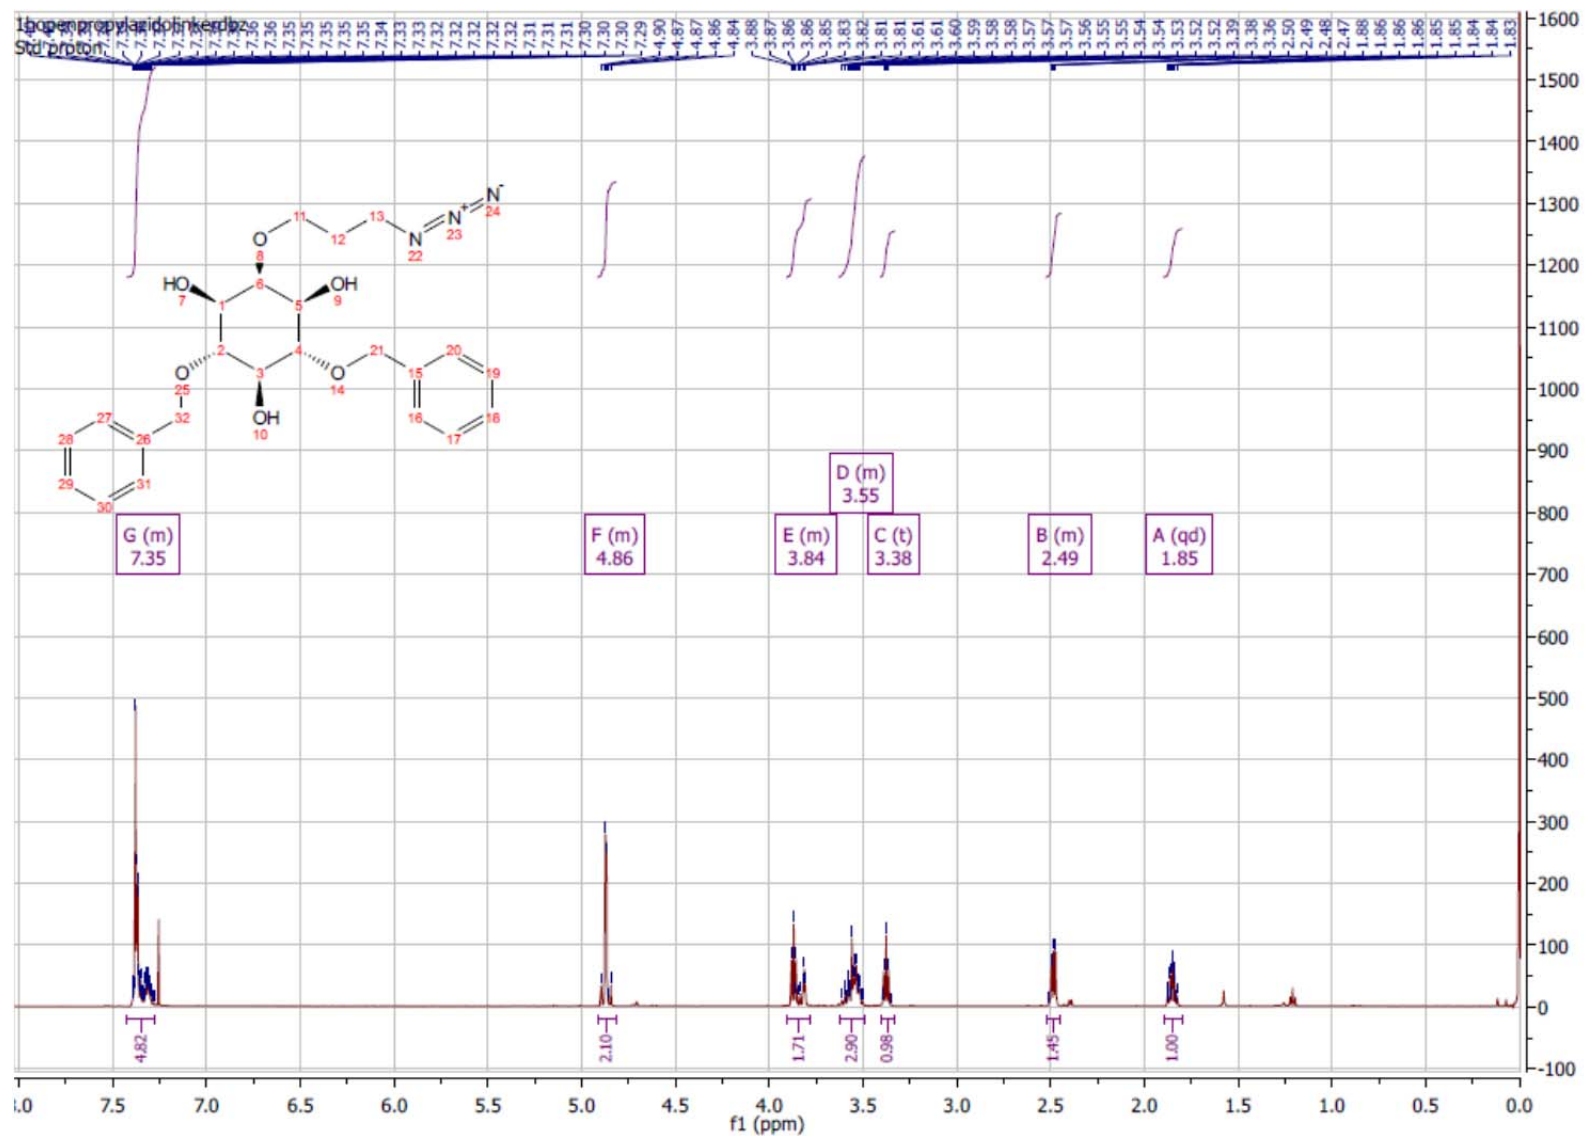

# <sup>13</sup>C NMR of compound 5

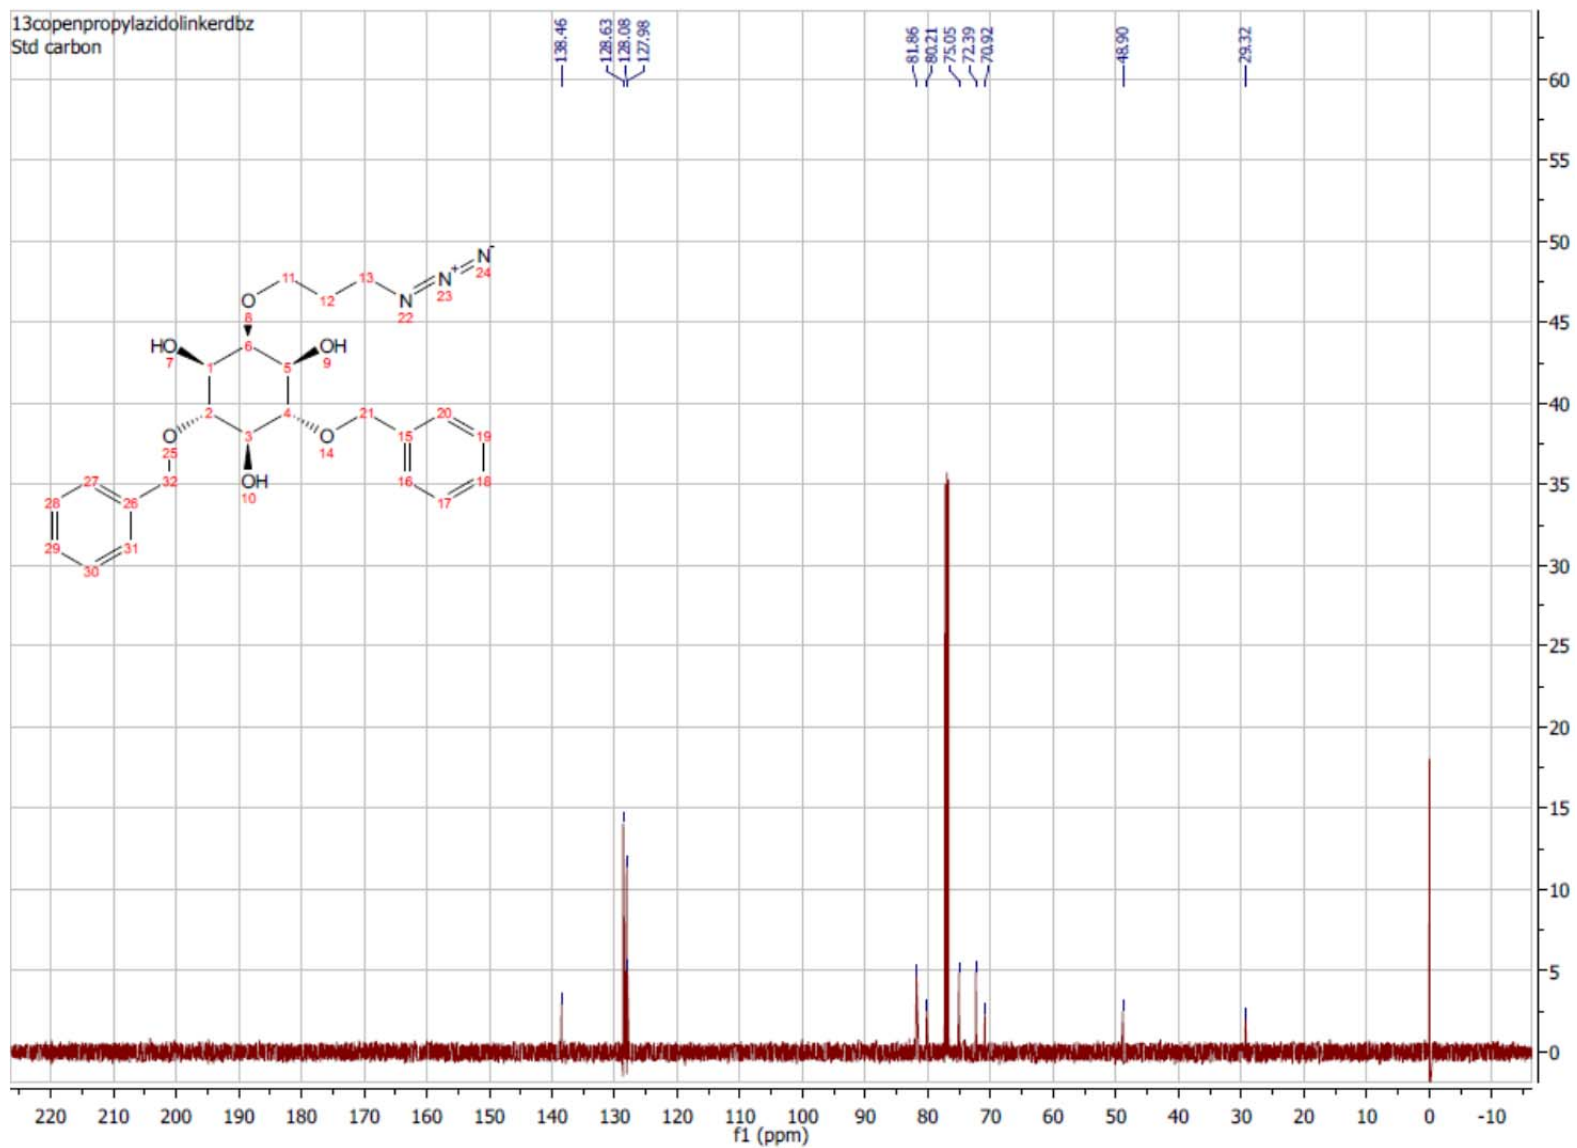

# ESI-MS of compound 5

Acq. Data Name: 140117\_Best\_tricks\_propylinkerdbz  
Internal Sample Id:  
Ionization Mode: ESI+ Orifice1 Volt Sweep: 30V  
MS Calibration Name: PEG\_DART\_1000 Acquired m/z Range: 220.0..500.0  
Reduction History: Correct Base[5.0%];Average(MS[1] 1.829..1.877)  
Experiment Date/Time: 1/17/2014 1:20:20 PM

Spec. Record Interval: 1.0[s]  
Ring Lens Volt: 10[V]  
Time of Maximum: 1.859[min]

Operator Name: Tricks

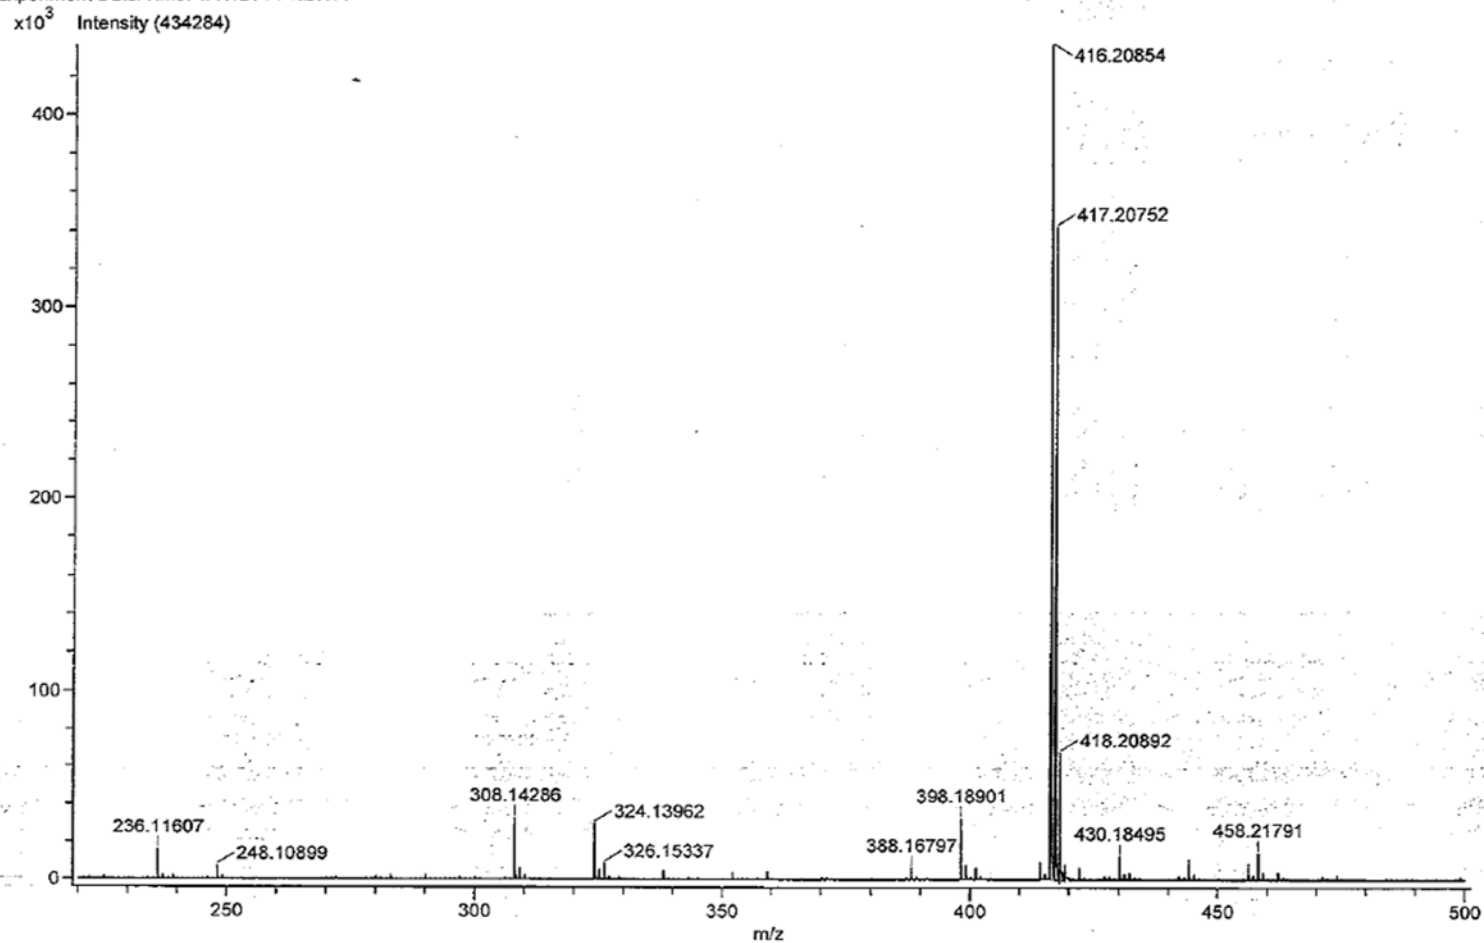

<sup>1</sup>H NMR of compound 6

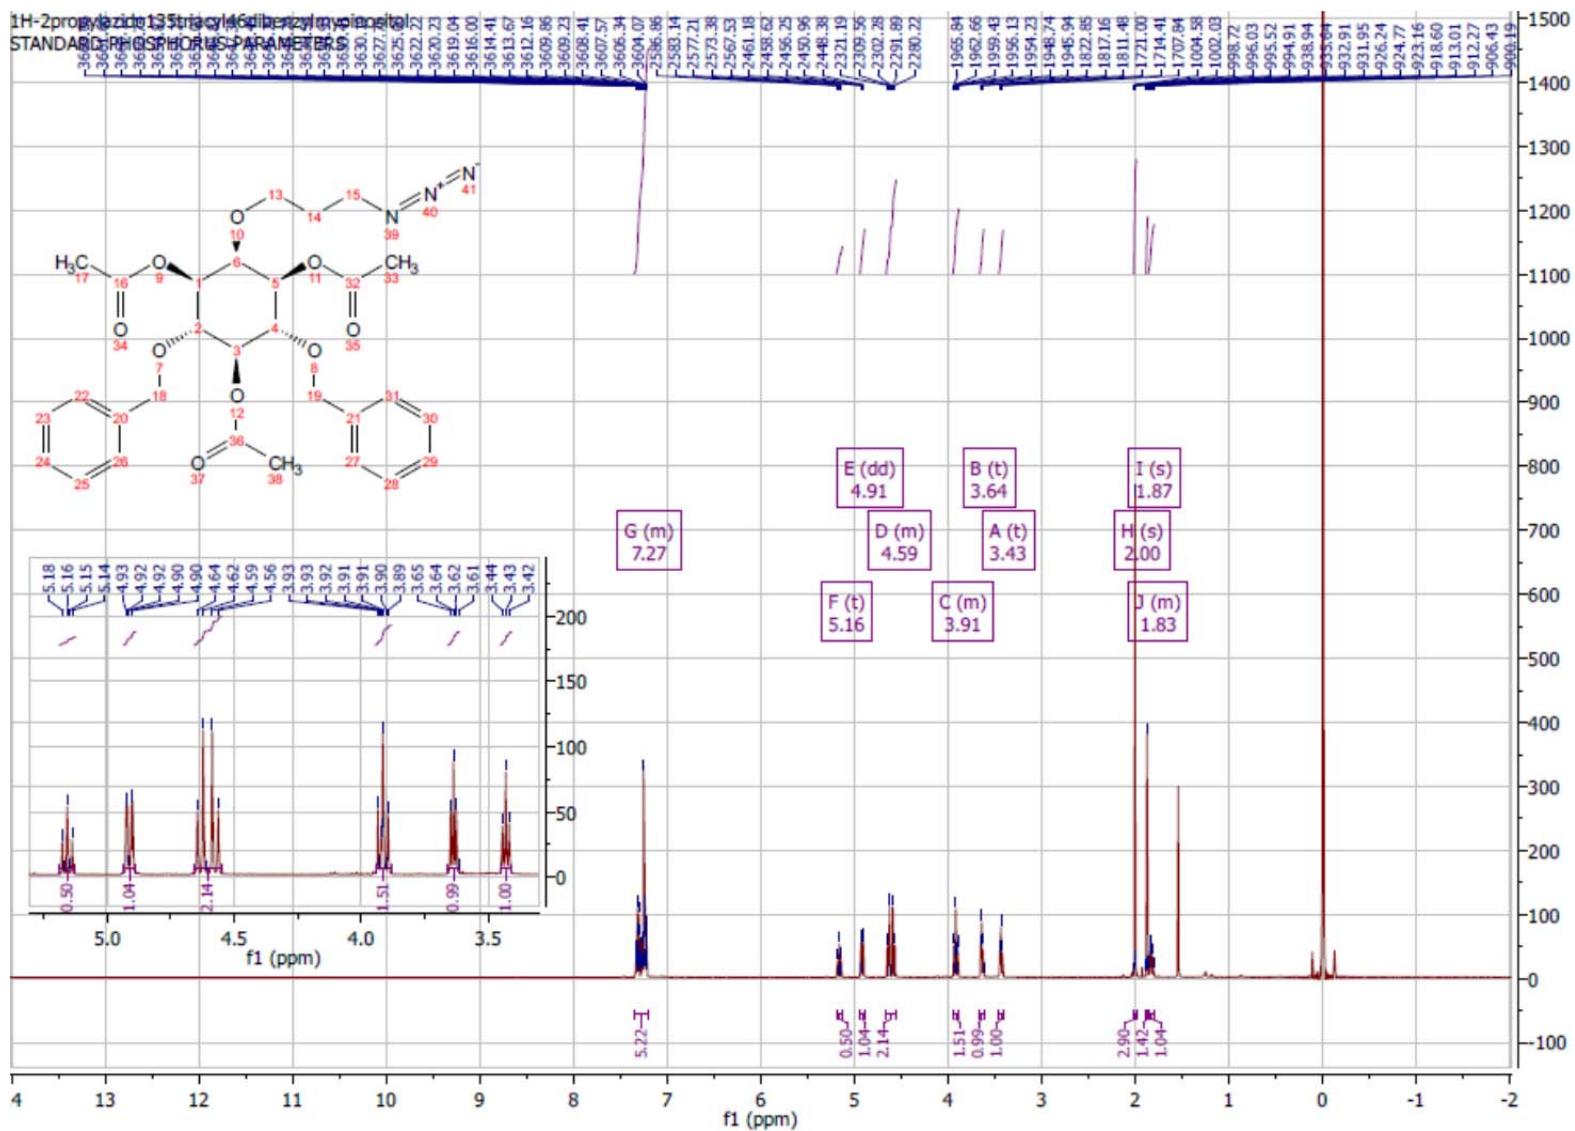

<sup>13</sup>C NMR of compound 6

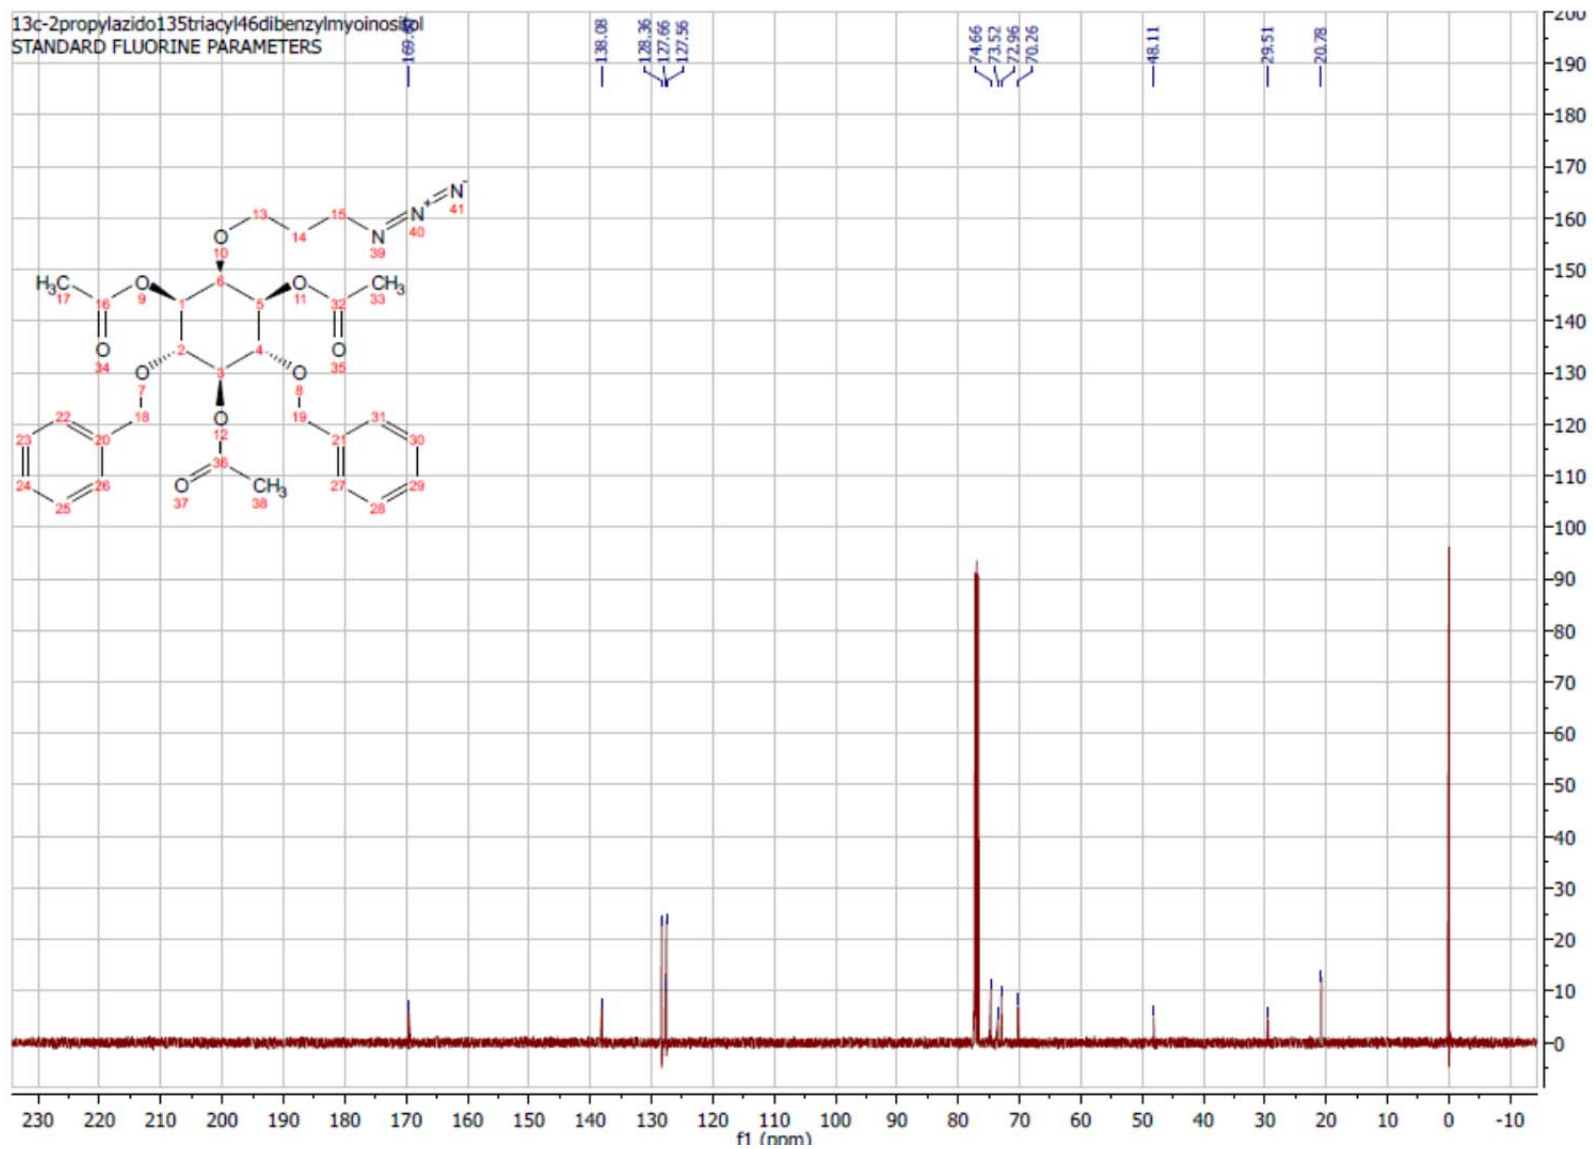



# ESI-MS of compound 6

Acq. Data Name: 150430\_Best\_tricks\_2propylazidod benzyltriacyltrycinoidol  
Internal Sample Id:  
Ionization Mode: ESI+  
MS Calibration Name: DART(+)\_1000  
Reduction History: Correct Base[5.0%] Average[MS[1] 1.957\_2.002]  
Experiment Date/Time: 4/30/2015 4:43:00 PM

Orifice1 Volt Sweep: 15V  
Acquired m/z Range: 100.0\_700.0

Spec. Record Interval: 0.5(s)  
Ring Lens Volt: 10(V)  
Time of Maximum: 1.990(min)

Operator Name: tricks

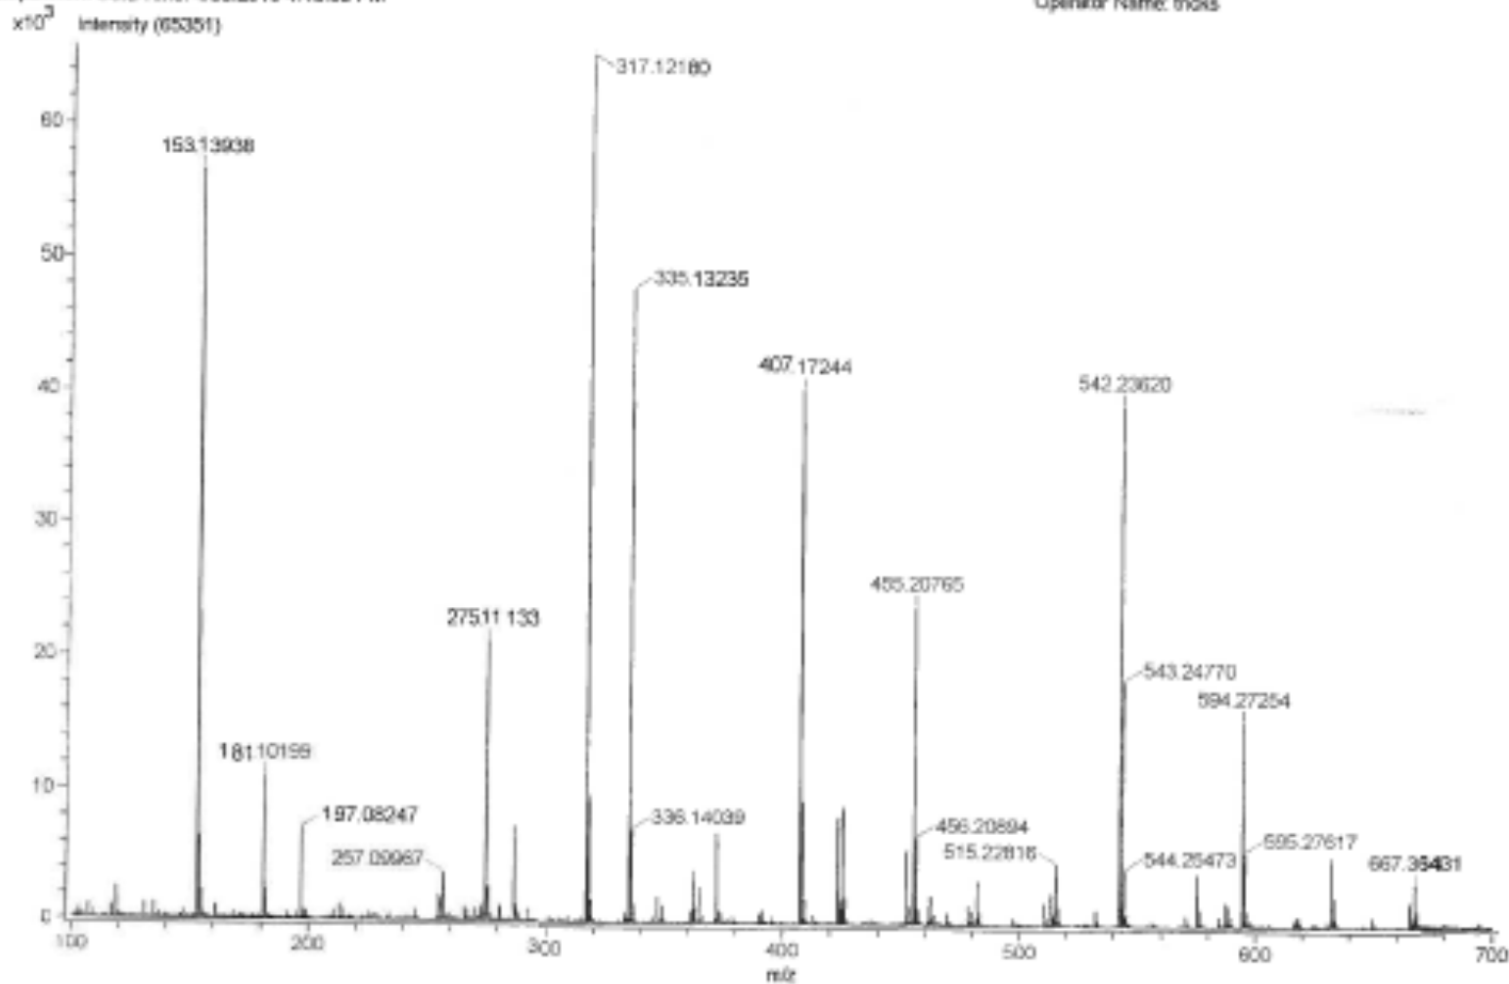

# <sup>1</sup>H NMR of compound 7

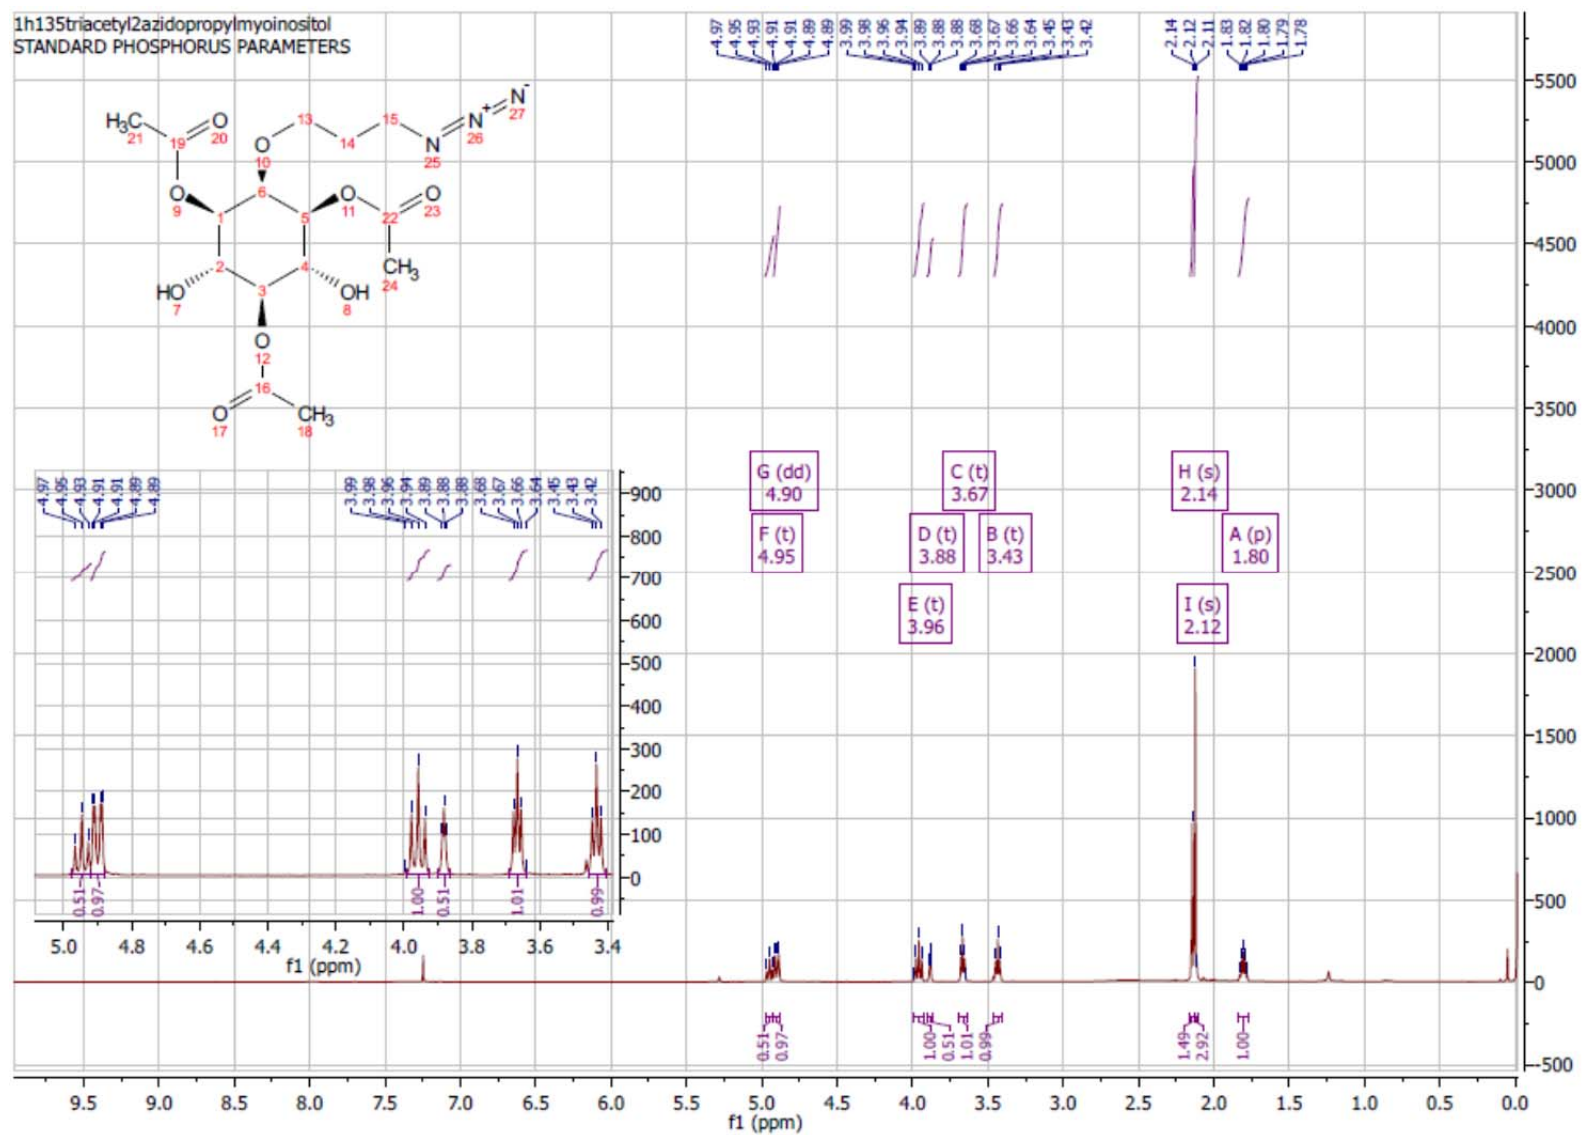

# $^{13}\text{C}$ NMR of compound 7

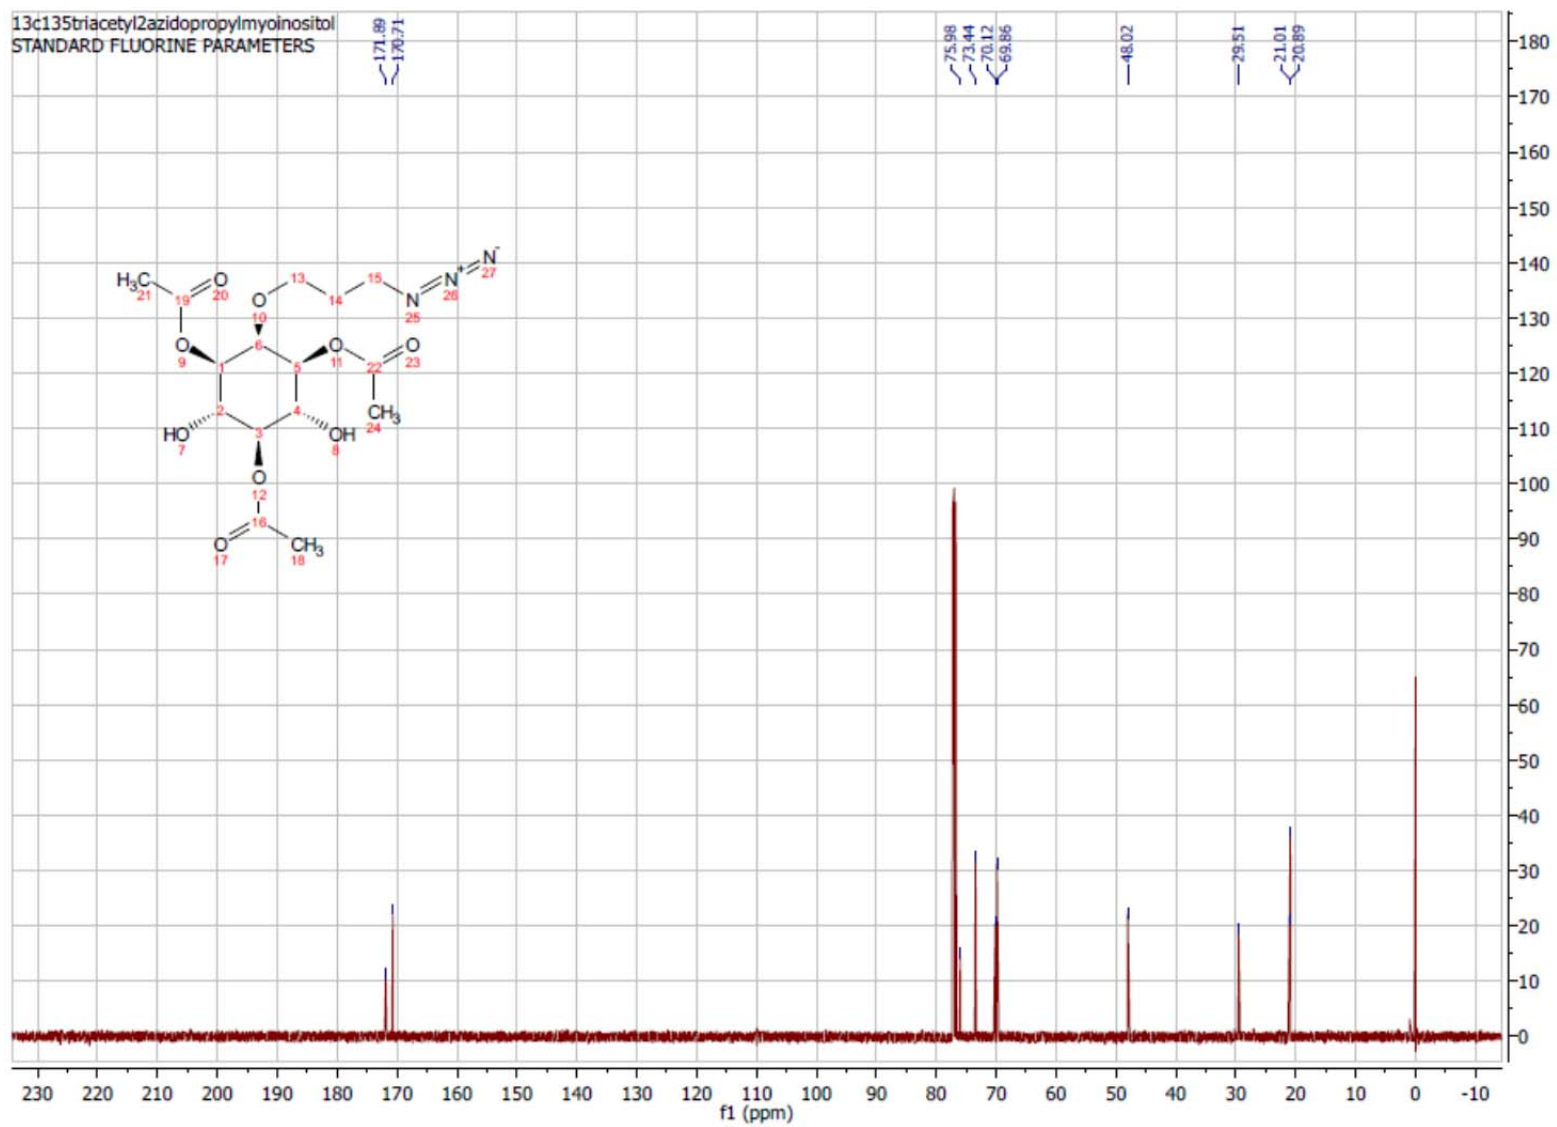

## ESI-MS of compound 7

Acq. Date Name: 170816\_best\_tricks\_13501acyl2propylazidomyo-inositol

Internal Sample Id:

Ionization Mode: ESI+

MS Calibration Name: DART(+)\_1000

Reduction History: Correct Base(5.0%)/Average(MS(1) 0.576..0.638)

Experiment Date/Time: 8/16/2017 1:34:15 PM

Orifice1 Volt Sweep: 15V

Acquired m/z Range: 100.0..800.0

Spec. Record Interval: 1.0(s)

Ring Lens Volt: 10[V]

Time of Maximum: 0.610[min]

Operator Name: tricks

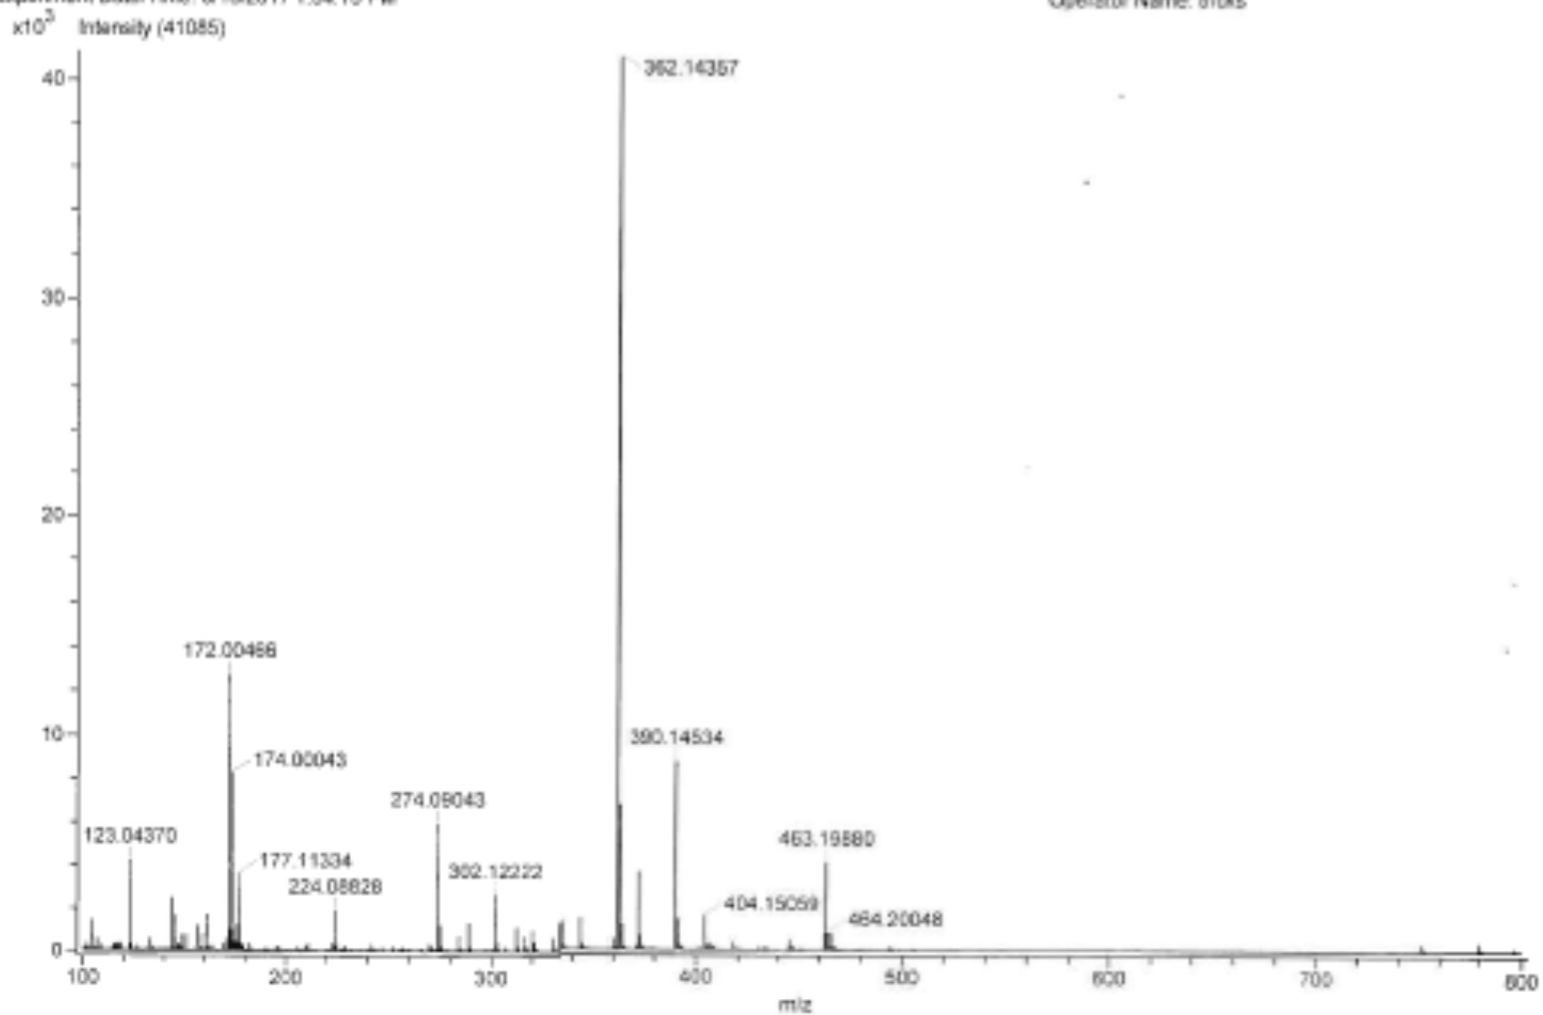

# <sup>1</sup>H NMR of compound 1b

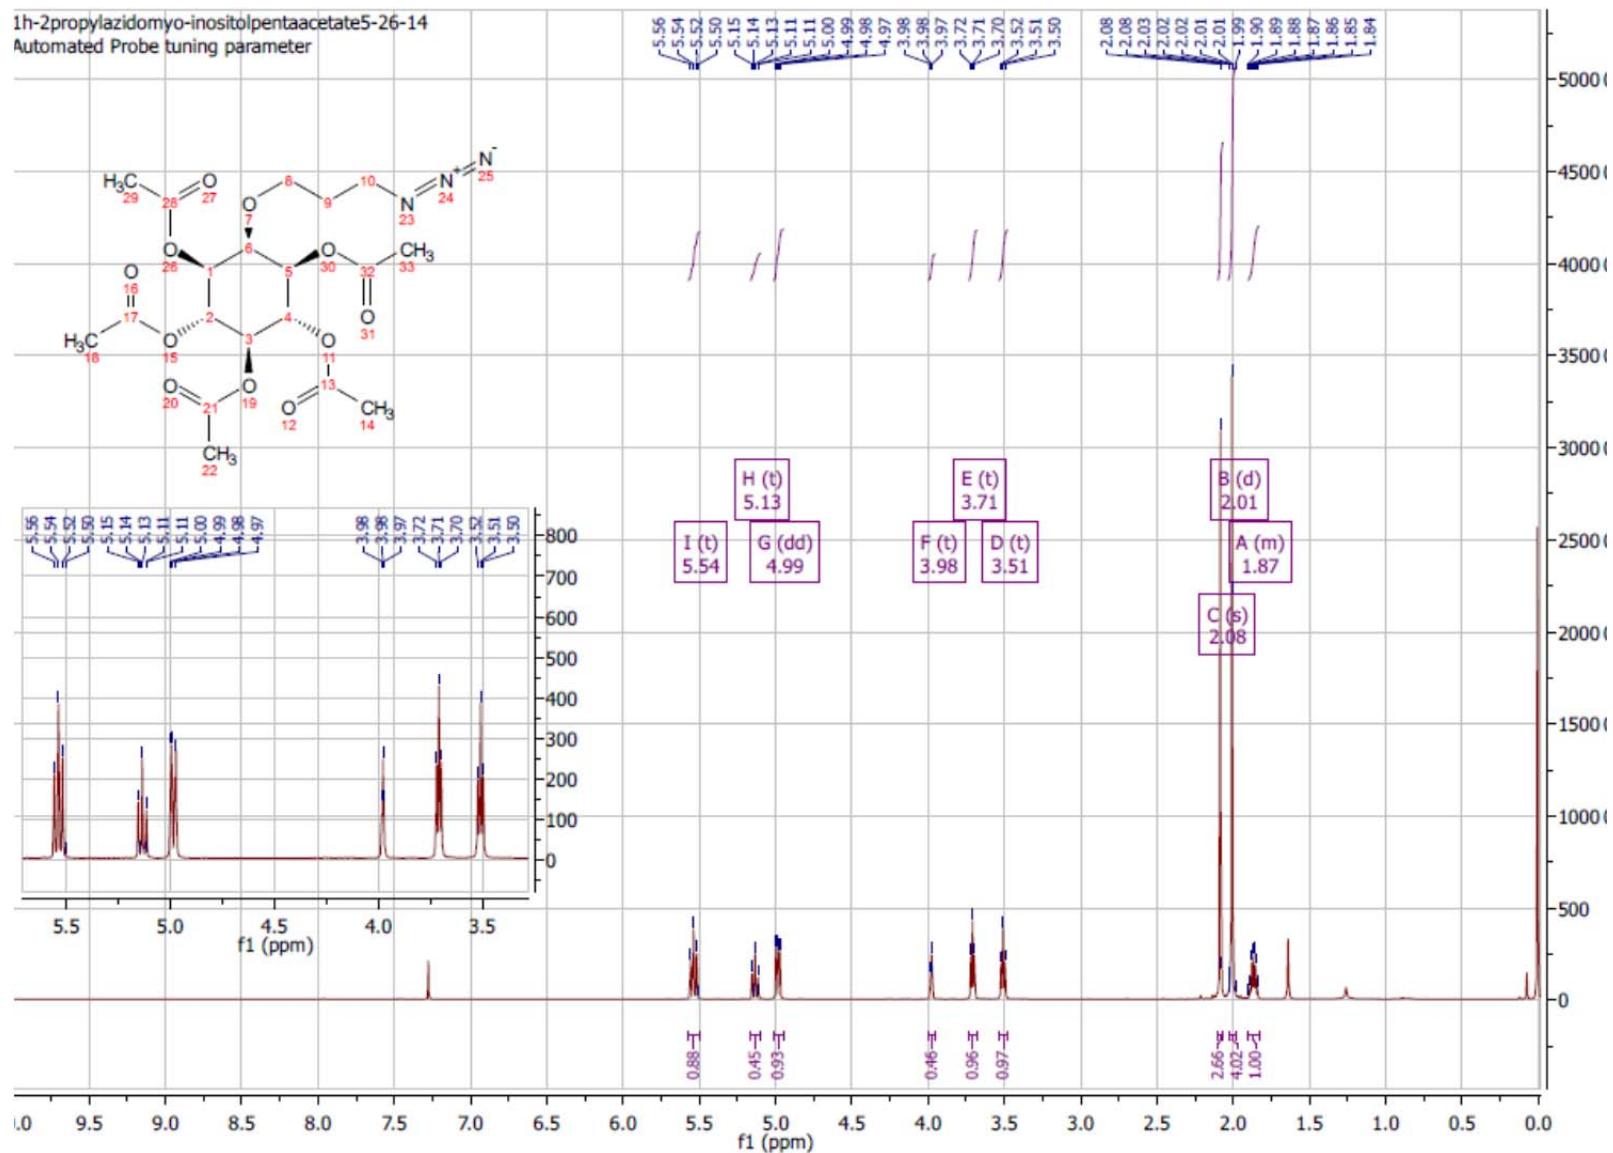

# <sup>13</sup>C NMR of compound 1b

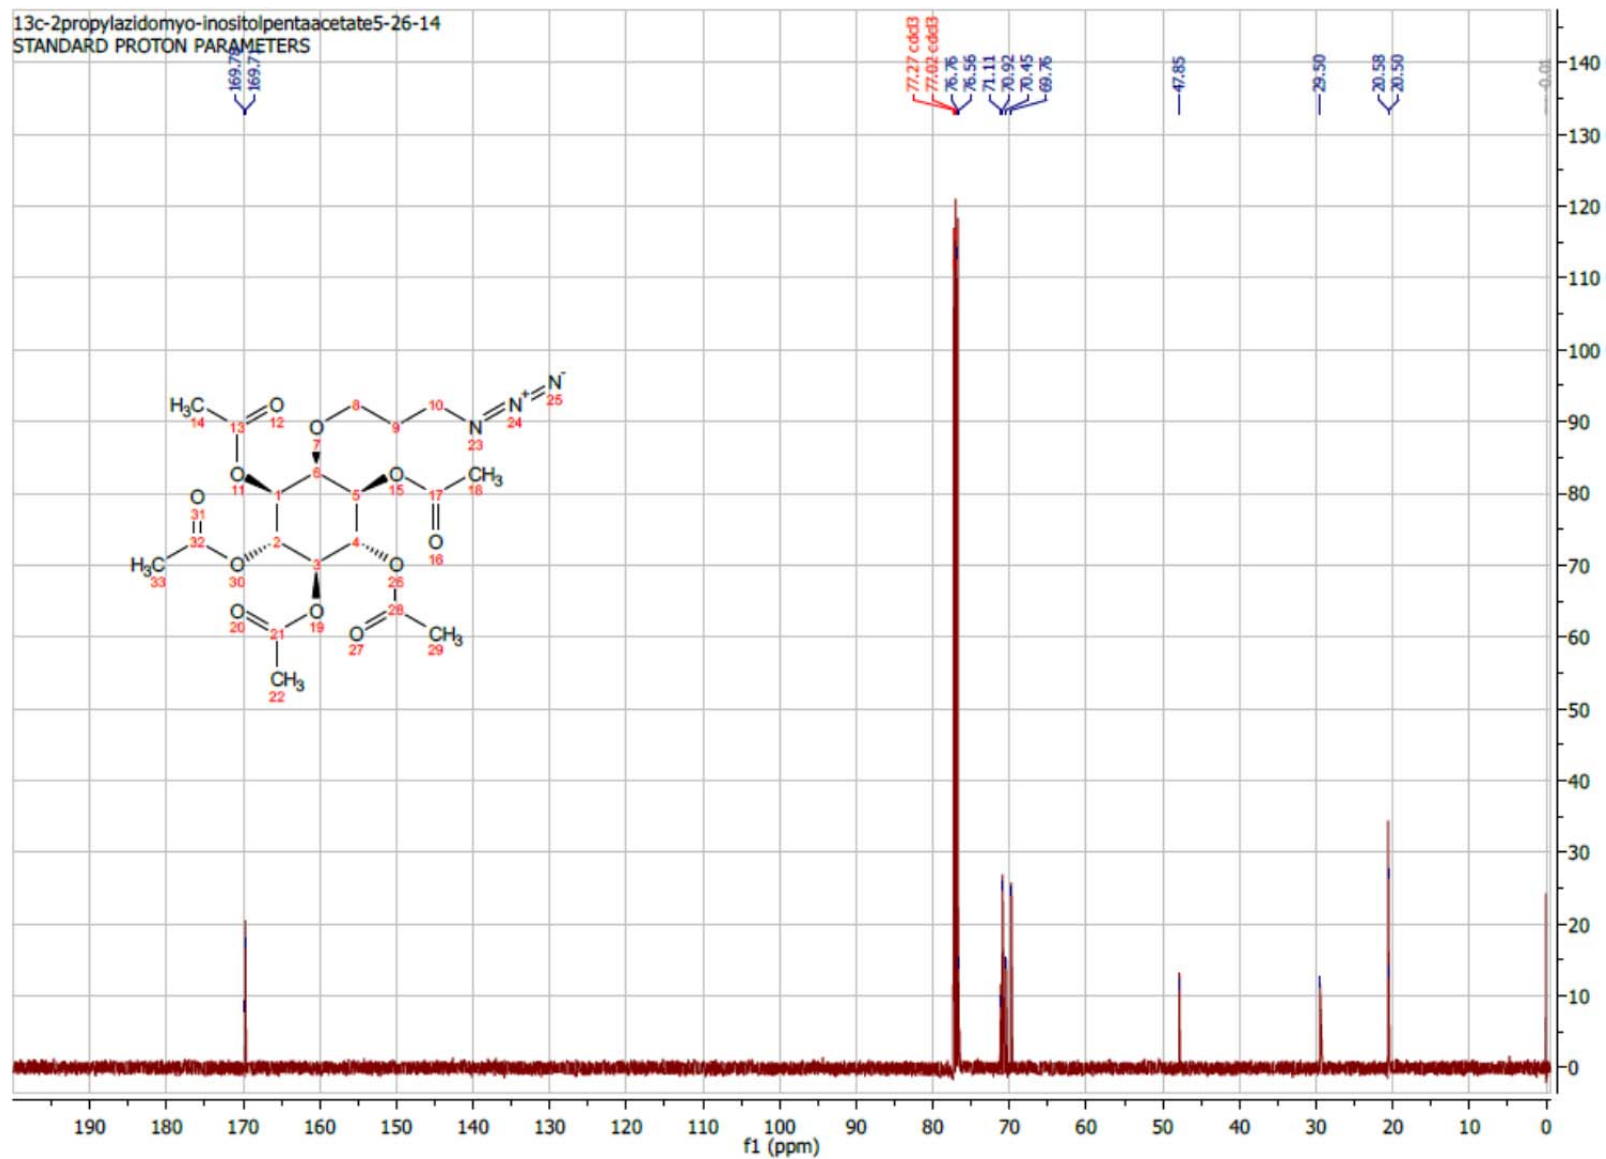

# ESI-MS of compound 1b

Acq. Data Name: 140501\_Best\_tricks\_2azidopropylpentaacetylmyoinositol  
Internal Sample Id:  
Ionization Mode: ESI+ Orifice1 Volt Sweep: 30V  
MS Calibration Name: PEG\_DART\_1000 Acquired m/z Range: 100.0..550.0  
Reduction History: Correct Base[5.0%];Average(MS[1] 1.059..1.135)  
Experiment Date/Time: 5/1/2014 3:41:58 PM

Spec. Record Interval: 1.0[s]  
Ring Lens Volt: 10[V]  
Time of Maximum: 1.098[min]

Operator Name: Tricks

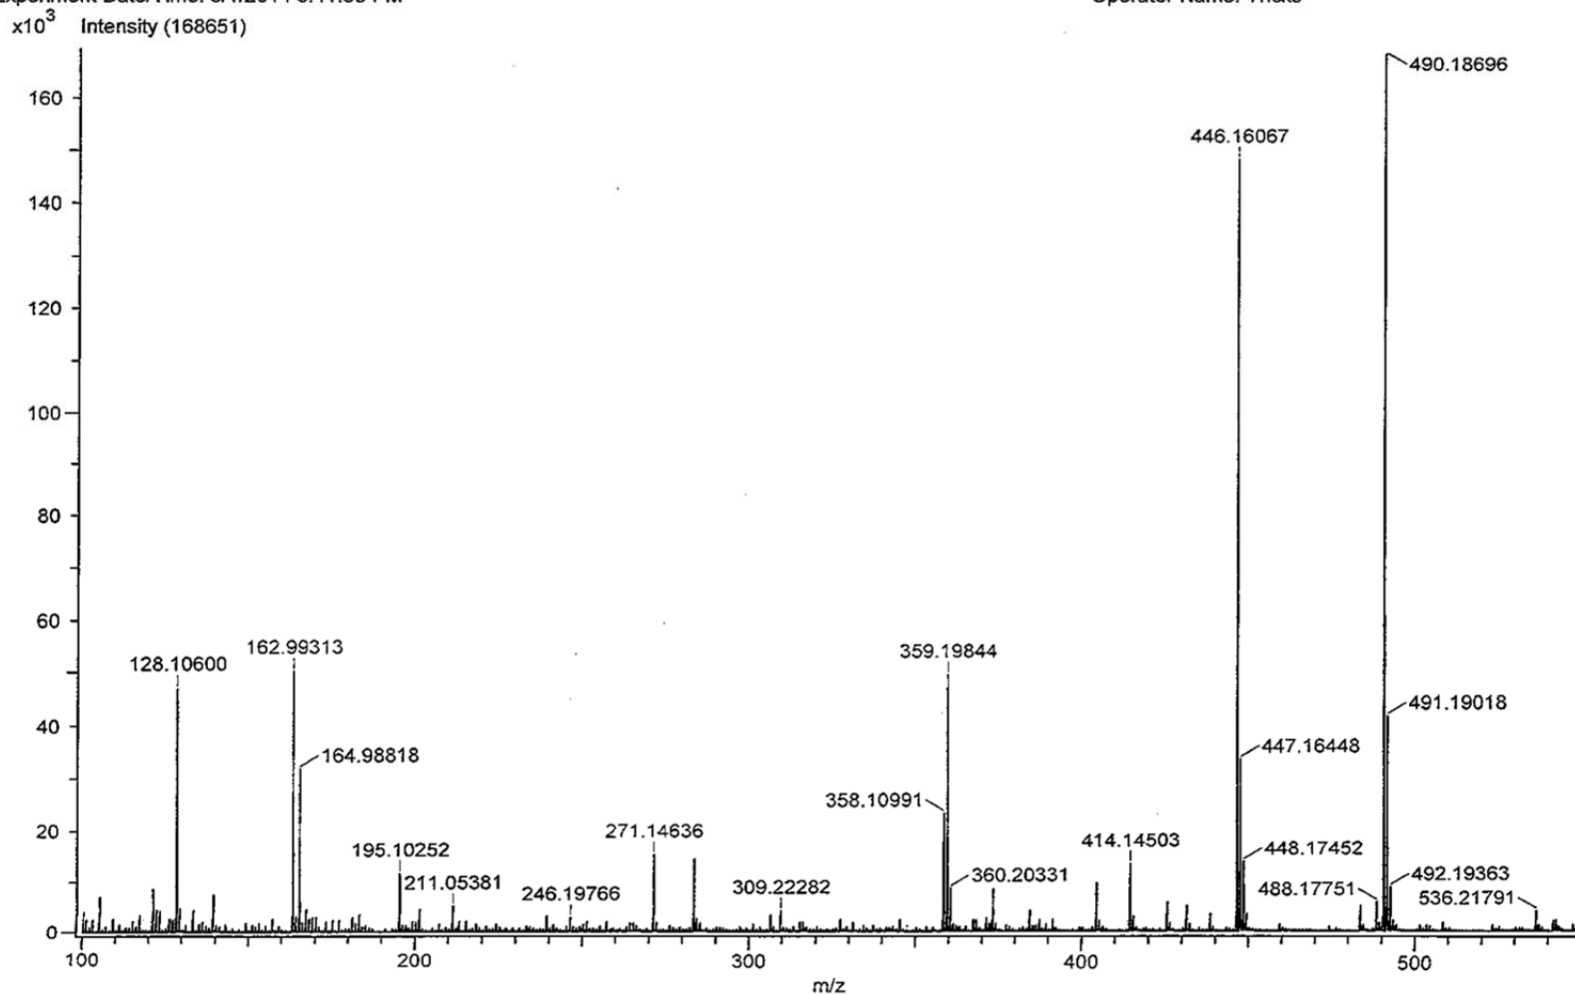



# <sup>1</sup>H NMR of compound 1a

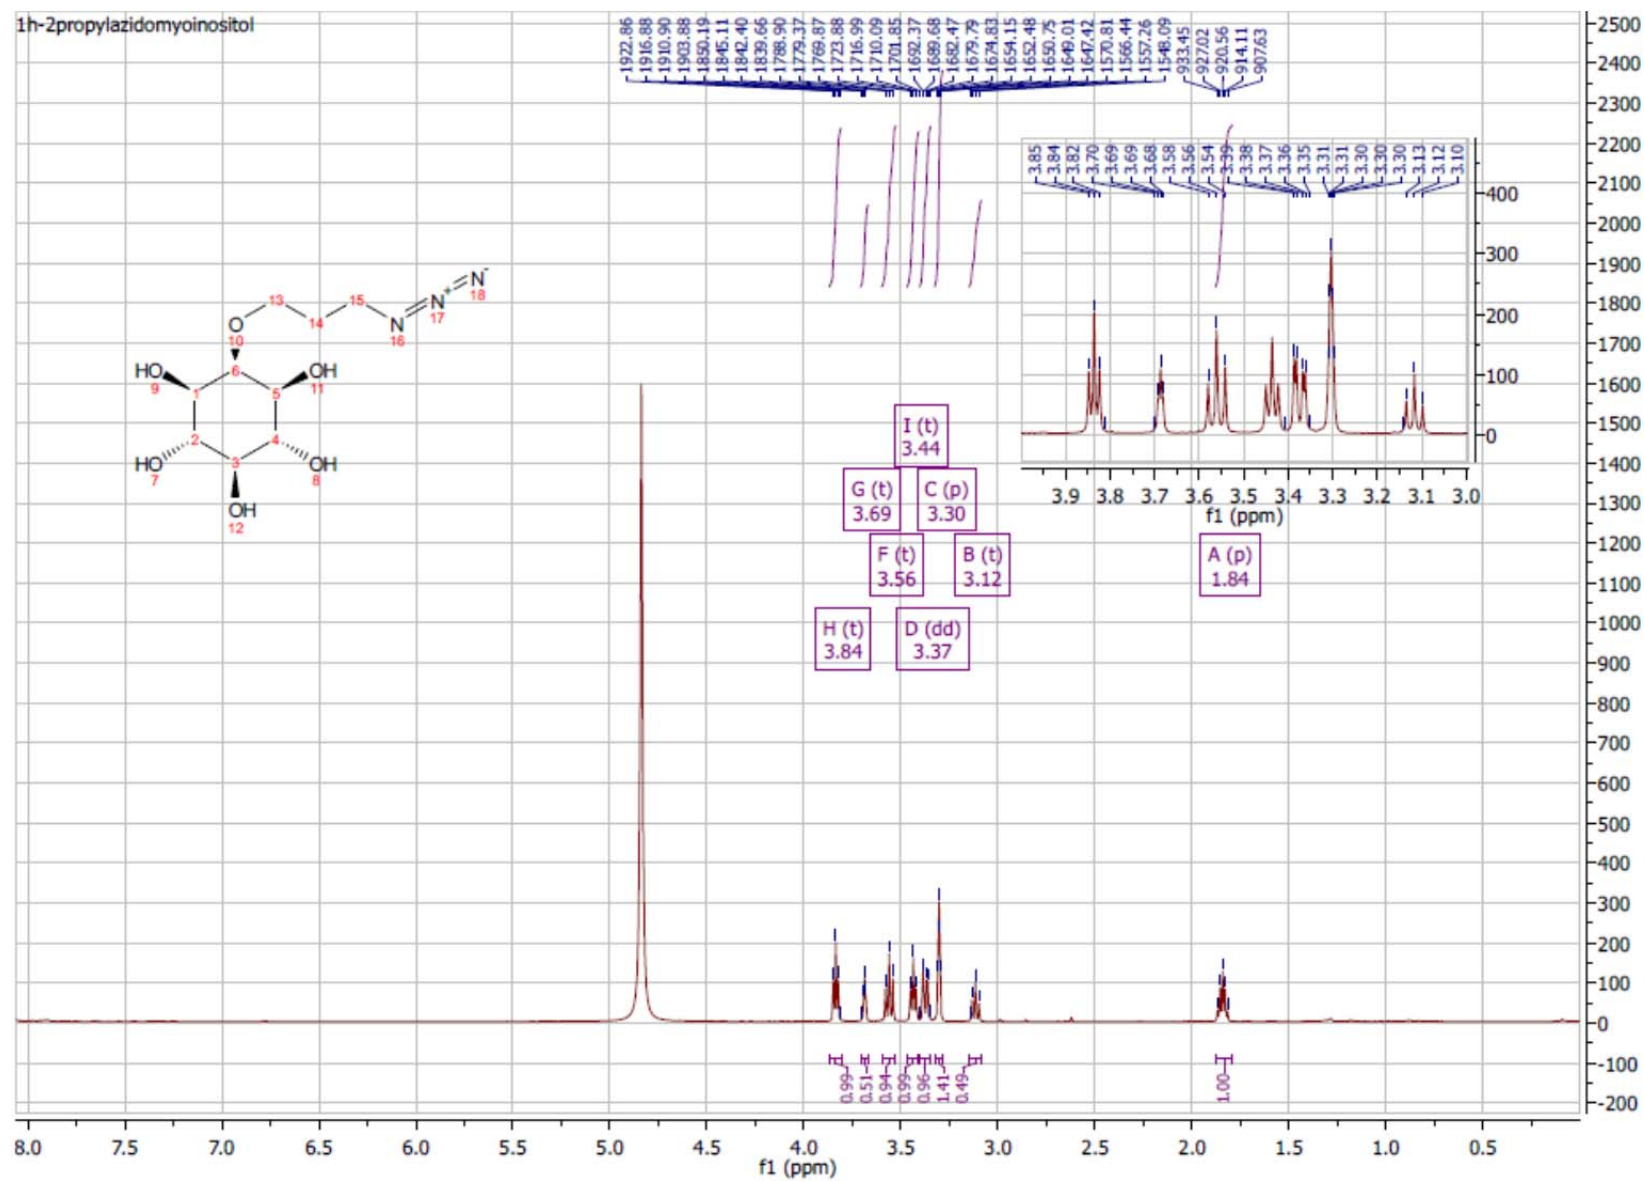

# ESI-MS of compound 1a

Acq. Data Name: 160523\_Best\_tricks\_propylazidomyoinositol  
Internal Sample Id:  
Ionization Mode: ESI+ Orifice1 Volt Sweep: 15V  
MS Calibration Name: DART(+)\_1000 Acquired m/z Range: 100.0..300.0  
Reduction History: Correct Base[5.0%];Average(MS[1]) 1.083..1.132  
Experiment Date/Time: 5/23/2016 3:39:47 PM

Spec. Record Interval: 1.0[s]  
Ring Lens Volt: 10[V]  
Time of Maximum: 1.115[min]

Operator Name: tricks

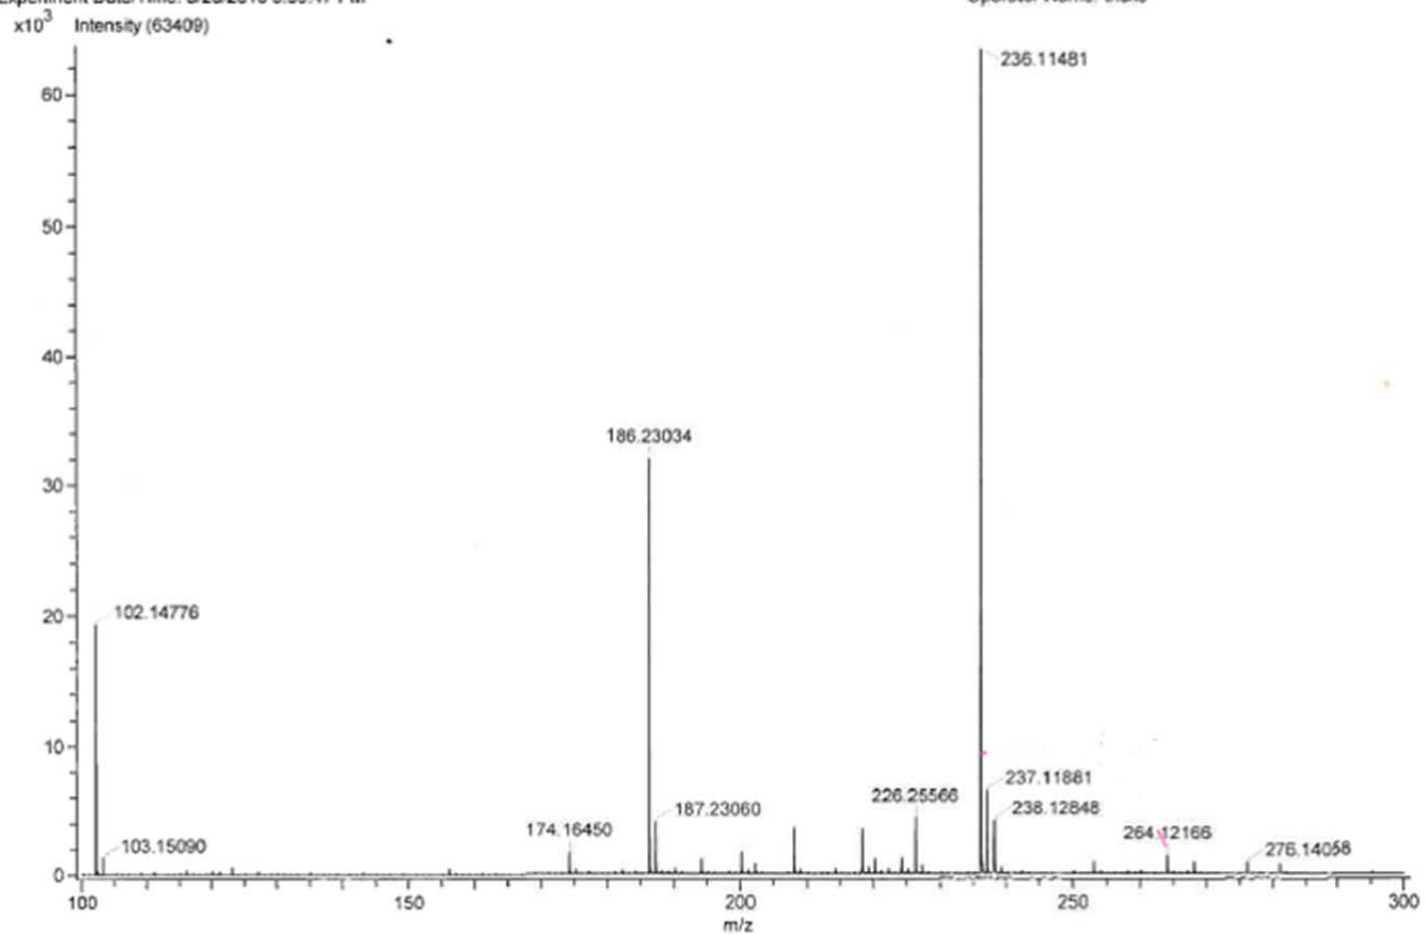

Supplement: NIHMS990059-supplement-Supplemental.pdf [file NIHMS990059-supplement-Supplemental.pdf]
